# Supplementary material for: Adsorption and decomposition of dimethyl methylphosphonate on size-selected (MoO3)3 clusters
Source: Royal Society of Chemistry journal article supplement (doi:10.1039/c7cp08427g), 2018-01-01
Supplement: c7cp08427g1.pdf [file c7cp08427g1.pdf]

## Adsorption and Decomposition of Dimethyl Methylphosphonate on Size-Selected $(\text{MoO}_3)_3$ Clusters

Xin Tang<sup>1</sup>, Zachary Hicks<sup>1</sup>, Linjie Wang<sup>1</sup>, Gerd Ganteför<sup>2</sup>, Kit H. Bowen<sup>1 a)</sup>  
Roman Tsyshevsky<sup>3</sup>, Jianwei Sun<sup>4</sup>, Maija M. Kuklja<sup>3 b)</sup>

<sup>1</sup> Department of Chemistry, Johns Hopkins University, Baltimore, Maryland 21218, USA

<sup>2</sup> Department of Physics, University of Konstanz, 78464 Konstanz, Germany

<sup>3</sup> Department of Materials Science, University of Maryland, College Park, Maryland 20742, USA

<sup>4</sup> Department of Physics, Tulane University, New Orleans, Louisiana 70118, USA

a) Electronic mail: [kbowen@jhu.edu](mailto:kbowen@jhu.edu); b) Electronic mail: [mkukla@umd.edu](mailto:mkukla@umd.edu)

### Supporting Information

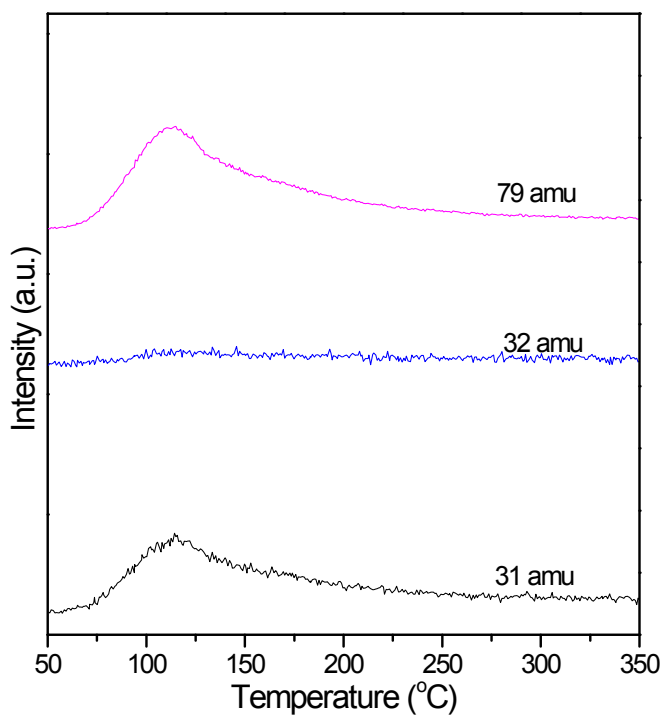

**Figure S1.** TPD Profiles of DMMP on HOPG. 79 amu is the major fragment of DMMP, 32 amu is methanol, 31 amu is methoxy which is a fragment of both methanol and DMMP.

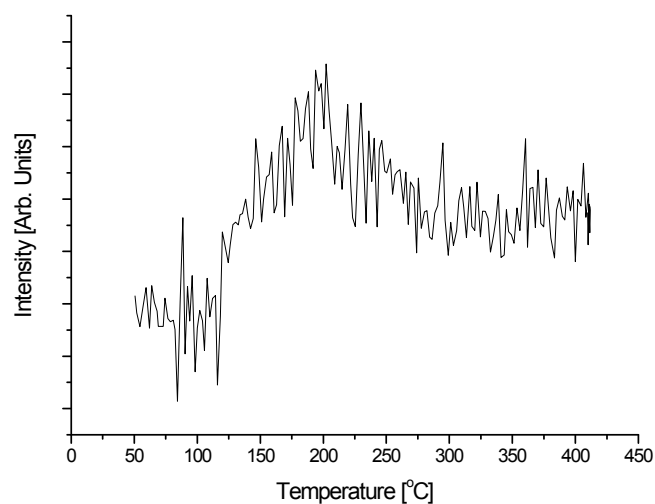

**Figure S2** Subtraction of DMMP Contribution from 15 amu.

**Table S1** Calculated decomposition energies (in kcal/mol) of DMMP in gas phase

| Reaction |                                             | DFT functional <sup>a</sup> |           |          |
|----------|---------------------------------------------|-----------------------------|-----------|----------|
|          |                                             | B3LYP                       | CAM-B3LYP | B3LYP+D3 |
| 1        | P=O                                         | 127                         | 130.7     | 128.5    |
| 2        | P-CH <sub>3</sub>                           | 79.3                        | 84.0      | 82.0     |
| 3        | PO-CH <sub>3</sub> (1)                      | 76.8                        | 83.3      | 78.7     |
| 4        | P-OCH <sub>3</sub> (1)                      | 86.6                        | 93.1      | 89.5     |
| 5        | CH <sub>3</sub> OH loss<br>(intramolecular) | 64.8                        | 67.5      | 64.1     |

<sup>a</sup> All calculations were carried out using 6-31+G(d,p) basis set

### Atomic coordinates (B3LYP+D3)

#### DMMP molecule

|    |              |              |              |
|----|--------------|--------------|--------------|
| 15 | 0.088663000  | -0.019321000 | -0.046044000 |
| 8  | 0.090948000  | -0.101696000 | 1.441772000  |
| 6  | 1.701715000  | 0.103974000  | -0.850768000 |
| 1  | 1.577748000  | 0.156737000  | -1.934450000 |
| 1  | 2.214168000  | 0.999035000  | -0.490714000 |
| 1  | 2.292054000  | -0.777337000 | -0.587391000 |
| 8  | -0.673052000 | -1.272400000 | -0.760118000 |
| 8  | -0.676993000 | 1.242246000  | -0.704968000 |
| 6  | -0.784244000 | -2.535371000 | -0.073219000 |
| 1  | -0.977868000 | -2.381499000 | 0.991336000  |
| 1  | -1.616543000 | -3.066694000 | -0.538289000 |
| 1  | 0.135120000  | -3.118220000 | -0.199955000 |
| 6  | -2.021071000 | 1.543550000  | -0.274014000 |
| 1  | -2.708691000 | 0.758893000  | -0.605697000 |
| 1  | -2.061461000 | 1.643251000  | 0.814631000  |
| 1  | -2.286558000 | 2.490248000  | -0.746028000 |

**DMMP on Mo<sub>3</sub>O<sub>9</sub>**

|    |              |              |              |
|----|--------------|--------------|--------------|
| 42 | 1.217994000  | -0.592783000 | -0.100912000 |
| 8  | 1.805172000  | 0.212826000  | -1.728211000 |
| 8  | 1.826194000  | -2.403893000 | -0.051643000 |
| 8  | -0.477293000 | -0.668296000 | -0.192328000 |
| 8  | 1.569599000  | 0.320006000  | 1.308903000  |
| 42 | 3.380694000  | -3.119082000 | -0.913199000 |
| 42 | 3.367598000  | -0.236494000 | -2.740997000 |
| 8  | 3.828486000  | -2.073997000 | -2.452551000 |
| 8  | 4.689628000  | -3.430399000 | 0.146528000  |
| 8  | 2.910189000  | -4.637454000 | -1.515323000 |
| 8  | 2.914408000  | -0.122819000 | -4.375446000 |
| 8  | 4.661897000  | 0.863726000  | -2.540724000 |
| 15 | 4.903300000  | 0.093011000  | 0.650790000  |
| 8  | 3.862310000  | -0.659755000 | -0.182138000 |
| 6  | 4.536168000  | 1.840338000  | 0.786169000  |
| 1  | 4.531219000  | 2.263156000  | -0.221642000 |
| 1  | 3.548592000  | 1.944519000  | 1.242642000  |
| 1  | 5.294442000  | 2.332695000  | 1.398303000  |

|   |             |              |              |
|---|-------------|--------------|--------------|
| 8 | 5.064158000 | -0.529757000 | 2.113792000  |
| 8 | 6.369710000 | 0.059806000  | 0.040161000  |
| 6 | 4.062238000 | -1.349446000 | 2.774888000  |
| 1 | 3.972735000 | -2.304980000 | 2.256361000  |
| 1 | 4.441973000 | -1.505596000 | 3.784395000  |
| 1 | 3.101620000 | -0.831996000 | 2.807389000  |
| 6 | 6.959315000 | -1.172815000 | -0.453662000 |
| 1 | 8.008483000 | -0.942966000 | -0.635285000 |
| 1 | 6.862022000 | -1.971462000 | 0.284660000  |
| 1 | 6.469667000 | -1.460855000 | -1.386659000 |

**DMMP on Mo<sub>3</sub>O<sub>8</sub>**

|    |              |              |              |
|----|--------------|--------------|--------------|
| 42 | 1.039118000  | -0.242622000 | -0.120169000 |
| 8  | 1.581301000  | 0.043342000  | -2.003872000 |
| 8  | 1.422986000  | -2.161880000 | 0.218434000  |
| 8  | -0.057511000 | 0.724505000  | 0.729163000  |
| 42 | 3.013615000  | -3.031731000 | -0.268459000 |
| 42 | 3.221656000  | -0.483394000 | -2.741527000 |
| 8  | 3.523870000  | -2.173339000 | -1.886632000 |
| 8  | 4.219977000  | -2.780248000 | 0.939347000  |
| 8  | 2.736048000  | -4.709180000 | -0.441989000 |
| 8  | 3.092494000  | -0.596893000 | -4.442083000 |
| 8  | 4.488186000  | 0.611390000  | -2.346430000 |
| 15 | 3.556502000  | 0.844398000  | 1.823092000  |
| 8  | 2.931718000  | 0.349938000  | 0.510733000  |
| 6  | 3.250818000  | 2.589798000  | 2.090313000  |
| 1  | 3.653530000  | 3.143784000  | 1.238910000  |
| 1  | 2.172308000  | 2.752318000  | 2.160128000  |
| 1  | 3.738023000  | 2.914259000  | 3.012176000  |
| 8  | 2.964818000  | 0.177023000  | 3.136286000  |

|   |             |              |              |
|---|-------------|--------------|--------------|
| 8 | 5.121127000 | 0.603193000  | 1.798201000  |
| 6 | 2.972945000 | -1.261449000 | 3.380322000  |
| 1 | 3.955303000 | -1.681931000 | 3.161983000  |
| 1 | 2.725616000 | -1.375472000 | 4.434799000  |
| 1 | 2.214562000 | -1.737365000 | 2.755750000  |
| 6 | 5.870522000 | 0.040500000  | 0.669004000  |
| 1 | 6.906163000 | 0.323269000  | 0.853546000  |
| 1 | 5.751870000 | -1.043027000 | 0.677087000  |
| 1 | 5.513228000 | 0.460768000  | -0.272174000 |

**DMMP on Mo<sub>3</sub>O<sub>9</sub>H**

|    |              |              |              |
|----|--------------|--------------|--------------|
| 42 | 1.164004000  | -0.564688000 | -0.120694000 |
| 8  | 1.778615000  | 0.146605000  | -1.752693000 |
| 8  | 1.761002000  | -2.376663000 | 0.019143000  |
| 8  | -0.537367000 | -0.580270000 | -0.173256000 |
| 8  | 1.609405000  | 0.382457000  | 1.249583000  |
| 42 | 3.143426000  | -3.199349000 | -1.007583000 |
| 42 | 3.340780000  | -0.208663000 | -2.864755000 |
| 8  | 3.411051000  | -2.112287000 | -2.522017000 |
| 8  | 4.586559000  | -3.446763000 | -0.101906000 |
| 8  | 2.608238000  | -4.730053000 | -1.527128000 |
| 8  | 2.757257000  | -0.100295000 | -4.445999000 |
| 15 | 4.889943000  | 0.160614000  | 0.624812000  |
| 8  | 3.914042000  | -0.564468000 | -0.278542000 |
| 6  | 4.505233000  | 1.894924000  | 0.871370000  |
| 1  | 4.511628000  | 2.404657000  | -0.095613000 |
| 1  | 3.502601000  | 1.948178000  | 1.303710000  |
| 1  | 5.238790000  | 2.350517000  | 1.539519000  |
| 8  | 5.102531000  | -0.525428000 | 2.046668000  |

|   |             |              |              |
|---|-------------|--------------|--------------|
| 8 | 6.360435000 | 0.200961000  | -0.041227000 |
| 6 | 4.154970000 | -1.470127000 | 2.630953000  |
| 1 | 4.173759000 | -2.398639000 | 2.059744000  |
| 1 | 4.512646000 | -1.637431000 | 3.646376000  |
| 1 | 3.152678000 | -1.037793000 | 2.646236000  |
| 6 | 7.101356000 | -1.051709000 | -0.181782000 |
| 1 | 7.904189000 | -0.843003000 | -0.888262000 |
| 1 | 7.511558000 | -1.332072000 | 0.790301000  |
| 1 | 6.449582000 | -1.845319000 | -0.556459000 |
| 8 | 4.974896000 | 0.722144000  | -2.685574000 |
| 1 | 5.587753000 | 0.654029000  | -1.930743000 |

### DMMP on Mo<sub>3</sub>O<sub>9</sub>H<sub>2</sub> (A1)

|    |              |              |              |
|----|--------------|--------------|--------------|
| 42 | 1.012009000  | -0.459897000 | -0.083220000 |
| 8  | 1.596856000  | 0.400354000  | -1.702048000 |
| 8  | 1.597601000  | -2.228559000 | -0.166568000 |
| 8  | -0.686824000 | -0.384334000 | 0.071507000  |
| 42 | 2.744774000  | -3.425699000 | -1.189555000 |
| 42 | 2.655586000  | -0.393729000 | -3.080431000 |
| 8  | 2.594435000  | -2.185928000 | -2.628831000 |
| 8  | 2.023352000  | -4.886280000 | -1.657263000 |
| 8  | 1.983706000  | -0.195842000 | -4.623638000 |
| 15 | 5.357917000  | 0.149295000  | 0.740334000  |
| 8  | 4.835491000  | -0.745885000 | -0.375759000 |
| 6  | 4.613511000  | 1.780065000  | 0.781755000  |
| 1  | 4.735434000  | 2.248418000  | -0.198425000 |
| 1  | 3.550838000  | 1.670286000  | 1.010720000  |
| 1  | 5.106927000  | 2.383189000  | 1.546825000  |
| 8  | 5.250315000  | -0.548206000 | 2.177862000  |
| 8  | 6.921920000  | 0.472819000  | 0.621445000  |

|   |             |              |              |
|---|-------------|--------------|--------------|
| 6 | 4.167746000 | -1.440038000 | 2.567907000  |
| 1 | 4.127495000 | -2.298367000 | 1.893822000  |
| 1 | 4.418442000 | -1.769029000 | 3.576174000  |
| 1 | 3.216641000 | -0.905282000 | 2.562345000  |
| 6 | 7.884320000 | -0.607937000 | 0.550915000  |
| 1 | 8.857723000 | -0.132933000 | 0.431116000  |
| 1 | 7.861927000 | -1.190989000 | 1.475691000  |
| 1 | 7.674310000 | -1.249539000 | -0.309911000 |
| 8 | 4.423806000 | 0.190797000  | -2.871043000 |
| 1 | 4.827202000 | -0.136670000 | -2.024950000 |
| 8 | 1.764691000 | 0.333444000  | 1.257414000  |
| 8 | 4.470378000 | -3.409693000 | -0.439422000 |
| 1 | 4.844414000 | -2.494982000 | -0.358689000 |

**DMMP on Mo<sub>3</sub>O<sub>9</sub>H<sub>2</sub> (A2)**

|    |             |              |              |
|----|-------------|--------------|--------------|
| 42 | 2.017925000 | 0.429483000  | -0.508173000 |
| 8  | 2.784669000 | 0.172332000  | -2.192346000 |
| 8  | 1.870781000 | -1.330940000 | 0.288158000  |
| 8  | 0.480085000 | 1.161855000  | -0.631529000 |
| 42 | 2.379080000 | -2.997637000 | -0.481711000 |
| 42 | 3.739370000 | -1.112183000 | -3.296807000 |
| 8  | 3.084149000 | -2.438316000 | -2.089659000 |
| 8  | 1.049801000 | -4.002489000 | -0.784310000 |
| 8  | 3.011582000 | -1.362352000 | -4.804595000 |
| 15 | 6.275429000 | -0.861937000 | 0.691073000  |
| 8  | 7.679968000 | -0.560968000 | 1.065267000  |
| 6  | 5.029662000 | -0.749746000 | 1.986965000  |
| 1  | 5.377689000 | -1.315688000 | 2.854123000  |
| 1  | 4.909133000 | 0.301637000  | 2.258628000  |
| 1  | 4.063798000 | -1.130247000 | 1.651748000  |
| 8  | 5.723715000 | 0.030807000  | -0.570836000 |
| 8  | 6.016714000 | -2.356245000 | 0.073795000  |
| 6  | 5.987356000 | 1.468021000  | -0.575768000 |



|   |             |              |              |
|---|-------------|--------------|--------------|
| 1 | 7.047685000 | 1.647542000  | -0.386587000 |
| 1 | 5.707983000 | 1.815904000  | -1.570557000 |
| 1 | 5.354020000 | 1.954123000  | 0.168007000  |
| 6 | 7.034384000 | -2.962811000 | -0.776849000 |
| 1 | 6.863125000 | -4.038645000 | -0.733552000 |
| 1 | 6.913054000 | -2.605559000 | -1.802634000 |
| 1 | 8.028011000 | -2.719147000 | -0.395537000 |
| 8 | 5.586970000 | -0.751007000 | -3.190970000 |
| 1 | 5.915886000 | -0.535994000 | -2.289661000 |
| 8 | 3.048474000 | 1.385770000  | 0.486172000  |
| 8 | 3.730313000 | -3.767241000 | 0.570077000  |
| 1 | 4.639519000 | -3.393494000 | 0.498174000  |

**DMMP on Mo<sub>3</sub>O<sub>9</sub>H<sub>2</sub> (A3)**

|    |             |              |              |
|----|-------------|--------------|--------------|
| 42 | 2.156300000 | -0.258632000 | 0.064850000  |
| 8  | 2.823278000 | -0.224013000 | -1.675522000 |
| 8  | 2.486288000 | -2.033860000 | 0.773927000  |
| 8  | 0.479047000 | 0.067233000  | 0.071545000  |
| 8  | 2.991515000 | 0.913599000  | 1.018296000  |
| 42 | 3.428562000 | -3.385700000 | -0.162322000 |
| 42 | 3.954165000 | -1.138356000 | -2.964528000 |
| 8  | 3.699263000 | -2.683210000 | -1.833187000 |
| 8  | 2.460855000 | -4.764058000 | -0.337495000 |
| 8  | 3.114607000 | -1.463792000 | -4.395232000 |
| 15 | 6.406654000 | -0.031686000 | 0.371079000  |
| 8  | 5.460772000 | -1.157137000 | 0.039078000  |
| 6  | 8.145648000 | -0.491866000 | 0.274374000  |
| 1  | 8.330820000 | -1.320411000 | 0.963014000  |
| 1  | 8.380336000 | -0.809923000 | -0.744609000 |
| 1  | 8.770899000 | 0.360429000  | 0.548405000  |
| 8  | 6.350216000 | 1.198241000  | -0.672731000 |
| 8  | 6.178963000 | 0.625513000  | 1.808935000  |

|   |             |              |              |
|---|-------------|--------------|--------------|
| 6 | 5.286412000 | 2.200664000  | -0.664196000 |
| 1 | 5.024126000 | 2.459391000  | 0.361624000  |
| 1 | 5.694712000 | 3.060689000  | -1.194052000 |
| 1 | 4.411895000 | 1.806588000  | -1.183397000 |
| 6 | 5.262827000 | 0.093353000  | 2.807096000  |
| 1 | 5.854552000 | -0.135887000 | 3.695342000  |
| 1 | 4.520718000 | 0.863308000  | 3.012870000  |
| 1 | 4.760111000 | -0.799964000 | 2.432814000  |
| 8 | 5.575701000 | -0.179923000 | -3.118152000 |
| 1 | 6.061292000 | 0.246912000  | -2.388414000 |
| 8 | 5.074371000 | -3.757678000 | 0.673753000  |
| 1 | 5.666687000 | -2.982796000 | 0.558675000  |

**DMMP on Mo<sub>3</sub>O<sub>9</sub>H<sub>2</sub> (A4)**

|    |              |              |              |
|----|--------------|--------------|--------------|
| 42 | -1.928652000 | 0.601169000  | 0.782171000  |
| 8  | -1.213278000 | 1.662354000  | -0.689512000 |
| 8  | -1.425054000 | -1.149255000 | 0.401788000  |
| 8  | -3.631764000 | 0.715168000  | 0.785705000  |
| 42 | 0.115886000  | -2.134363000 | -0.233248000 |
| 42 | 0.088083000  | 0.974822000  | -1.869209000 |
| 8  | 0.179596000  | -0.850156000 | -1.689526000 |
| 8  | -0.438415000 | -3.532811000 | -0.998145000 |
| 8  | -0.447621000 | 1.213796000  | -3.455806000 |
| 15 | 1.896957000  | 0.997799000  | 1.498093000  |
| 8  | 0.951300000  | 0.296012000  | 0.551445000  |
| 6  | 1.478332000  | 2.704594000  | 1.850569000  |
| 1  | 1.465498000  | 3.250089000  | 0.901296000  |
| 1  | 0.477976000  | 2.721297000  | 2.293350000  |
| 1  | 2.219193000  | 3.140309000  | 2.526449000  |
| 8  | 2.114452000  | 0.151019000  | 2.849273000  |

|   |              |              |              |
|---|--------------|--------------|--------------|
| 8 | 3.392839000  | 1.077332000  | 0.910495000  |
| 6 | 0.985150000  | -0.265070000 | 3.678546000  |
| 1 | 0.289670000  | -0.863520000 | 3.086228000  |
| 1 | 1.425123000  | -0.855402000 | 4.483026000  |
| 1 | 0.464182000  | 0.610474000  | 4.069490000  |
| 6 | 4.138679000  | -0.150451000 | 0.680338000  |
| 1 | 5.022044000  | 0.139875000  | 0.110290000  |
| 1 | 4.431893000  | -0.581326000 | 1.641356000  |
| 1 | 3.535546000  | -0.865330000 | 0.110099000  |
| 8 | 1.783668000  | 1.840094000  | -1.737525000 |
| 1 | 2.527171000  | 1.480833000  | -1.226840000 |
| 8 | -1.295624000 | 1.166751000  | 2.296286000  |
| 8 | 1.485939000  | -2.478749000 | 1.051130000  |
| 1 | 1.905090000  | -1.839345000 | 1.645832000  |

**DMMP on Mo<sub>3</sub>O<sub>9</sub>H<sub>3</sub> (B1)**

|    |              |              |              |
|----|--------------|--------------|--------------|
| 42 | 0.779159000  | -0.451158000 | -0.115689000 |
| 8  | 1.053016000  | -0.247843000 | -1.974281000 |
| 8  | 1.445676000  | -2.226080000 | 0.155696000  |
| 8  | -0.871086000 | -0.336884000 | 0.273965000  |
| 42 | 2.642708000  | -3.315715000 | -0.869135000 |
| 42 | 2.322835000  | -0.746637000 | -3.308970000 |
| 8  | 2.508618000  | -2.494925000 | -2.565728000 |
| 8  | 2.116175000  | -4.930769000 | -0.926181000 |
| 8  | 1.612450000  | -0.801710000 | -4.850128000 |
| 15 | 5.671382000  | 0.466758000  | 0.625495000  |
| 8  | 4.584358000  | -0.073691000 | -0.298683000 |
| 6  | 5.613586000  | 2.248908000  | 0.830064000  |
| 1  | 5.762177000  | 2.728563000  | -0.140446000 |
| 1  | 4.629707000  | 2.519568000  | 1.223662000  |
| 1  | 6.392214000  | 2.566603000  | 1.526705000  |
| 8  | 5.605355000  | -0.211655000 | 2.073946000  |
| 8  | 7.157165000  | 0.193699000  | 0.116161000  |

|   |             |              |              |
|---|-------------|--------------|--------------|
| 6 | 4.428397000 | -0.906325000 | 2.587316000  |
| 1 | 4.282983000 | -1.838196000 | 2.037893000  |
| 1 | 4.653685000 | -1.111636000 | 3.633259000  |
| 1 | 3.539033000 | -0.277105000 | 2.505410000  |
| 6 | 7.598208000 | -1.164704000 | -0.162582000 |
| 1 | 8.642997000 | -1.079054000 | -0.458239000 |
| 1 | 7.507847000 | -1.779971000 | 0.736179000  |
| 1 | 7.010006000 | -1.593660000 | -0.977762000 |
| 8 | 3.930968000 | 0.207889000  | -3.008895000 |
| 1 | 4.314100000 | 0.215610000  | -2.104130000 |
| 8 | 4.381849000 | -2.858392000 | -0.227607000 |
| 1 | 4.569401000 | -1.895801000 | -0.311835000 |
| 8 | 2.078304000 | 0.691518000  | 0.695237000  |
| 1 | 2.969015000 | 0.562849000  | 0.299361000  |

### DMMP on Mo<sub>3</sub>O<sub>9</sub>H<sub>3</sub> (B2)

|    |             |              |              |
|----|-------------|--------------|--------------|
| 42 | 1.745496000 | 0.245774000  | -0.685261000 |
| 8  | 2.345498000 | -0.198859000 | -2.421481000 |
| 8  | 1.887984000 | -1.492311000 | 0.113279000  |
| 8  | 0.128794000 | 0.760192000  | -0.740373000 |
| 42 | 2.417527000 | -3.258339000 | -0.441791000 |
| 42 | 3.584751000 | -1.345387000 | -3.294531000 |
| 8  | 3.202485000 | -2.793388000 | -2.109818000 |
| 8  | 1.054544000 | -4.232298000 | -0.706683000 |
| 8  | 3.045433000 | -1.673779000 | -4.869695000 |
| 15 | 6.212758000 | -0.749212000 | 0.771821000  |
| 8  | 7.628141000 | -0.608551000 | 1.194334000  |
| 6  | 4.922084000 | -0.689352000 | 2.026359000  |
| 1  | 5.149800000 | -1.434677000 | 2.792544000  |
| 1  | 4.915956000 | 0.304370000  | 2.480733000  |
| 1  | 3.941474000 | -0.896271000 | 1.591401000  |
| 8  | 5.774677000 | 0.402790000  | -0.348758000 |
| 8  | 5.828540000 | -2.110703000 | -0.024491000 |

|   |             |              |              |
|---|-------------|--------------|--------------|
| 6 | 6.591612000 | 1.612791000  | -0.466953000 |
| 1 | 7.649361000 | 1.350433000  | -0.436069000 |
| 1 | 6.325935000 | 2.057237000  | -1.426537000 |
| 1 | 6.347016000 | 2.299640000  | 0.347286000  |
| 6 | 6.803169000 | -2.746088000 | -0.909152000 |
| 1 | 6.427772000 | -3.754787000 | -1.080806000 |
| 1 | 6.847135000 | -2.201224000 | -1.853900000 |
| 1 | 7.779812000 | -2.773800000 | -0.422365000 |
| 8 | 5.322004000 | -0.632075000 | -2.982513000 |
| 1 | 5.528280000 | -0.267109000 | -2.098225000 |
| 8 | 3.785720000 | -3.887676000 | 0.718773000  |
| 1 | 4.634021000 | -3.405066000 | 0.692728000  |
| 8 | 3.092759000 | 1.351361000  | 0.080918000  |
| 1 | 4.028180000 | 1.116949000  | -0.076844000 |

**DMMP on Mo<sub>3</sub>O<sub>9</sub>H<sub>3</sub> (B3)**

|    |             |              |              |
|----|-------------|--------------|--------------|
| 42 | 2.827881000 | -0.063146000 | -0.409182000 |
| 8  | 3.004398000 | -0.587021000 | -2.196046000 |
| 8  | 3.218850000 | -1.794984000 | 0.299118000  |
| 8  | 1.215868000 | 0.366600000  | -0.091152000 |
| 42 | 3.773991000 | -3.503143000 | -0.390376000 |
| 42 | 4.118135000 | -1.527639000 | -3.383535000 |
| 8  | 4.386288000 | -2.959084000 | -2.127805000 |
| 8  | 2.403857000 | -4.493130000 | -0.534520000 |
| 8  | 3.209824000 | -2.021160000 | -4.729964000 |
| 15 | 7.343783000 | -0.970263000 | -0.402062000 |
| 8  | 6.476182000 | 0.068448000  | -1.075357000 |
| 6  | 7.782060000 | -2.391812000 | -1.402891000 |
| 1  | 6.867133000 | -2.910223000 | -1.702092000 |
| 1  | 8.304838000 | -2.038615000 | -2.294697000 |
| 1  | 8.428270000 | -3.063186000 | -0.833371000 |
| 8  | 8.732885000 | -0.358225000 | 0.123628000  |
| 8  | 6.636416000 | -1.660346000 | 0.877589000  |
| 6  | 8.933820000 | 1.068691000  | 0.294025000  |

|   |              |              |              |
|---|--------------|--------------|--------------|
| 1 | 8.426977000  | 1.624782000  | -0.497710000 |
| 1 | 8.555574000  | 1.380932000  | 1.271479000  |
| 1 | 10.011113000 | 1.227155000  | 0.244830000  |
| 6 | 6.186643000  | -0.882559000 | 2.022923000  |
| 1 | 5.581697000  | -1.562039000 | 2.622365000  |
| 1 | 7.056090000  | -0.547510000 | 2.594790000  |
| 1 | 5.575581000  | -0.038185000 | 1.698036000  |
| 8 | 5.742473000  | -0.593469000 | -3.645022000 |
| 1 | 6.130156000  | -0.156452000 | -2.853649000 |
| 8 | 5.265156000  | -4.115100000 | 0.637631000  |
| 1 | 5.957440000  | -3.468003000 | 0.861901000  |
| 8 | 4.221935000  | 1.140111000  | 0.039284000  |
| 1 | 5.100474000  | 0.956241000  | -0.369402000 |

## Atomic coordinates (CAM-B3LYP)

### DMMP molecule (PC<sub>3</sub>O<sub>3</sub>H<sub>9</sub>)

|    |              |              |              |
|----|--------------|--------------|--------------|
| 15 | 0.084064000  | -0.024749000 | -0.053434000 |
| 8  | 0.079829000  | -0.104799000 | 1.427236000  |
| 6  | 1.691212000  | 0.107269000  | -0.843224000 |
| 1  | 1.577913000  | 0.157454000  | -1.927093000 |
| 1  | 2.195114000  | 1.005751000  | -0.482871000 |
| 1  | 2.289314000  | -0.766178000 | -0.575496000 |
| 8  | -0.660984000 | -1.277366000 | -0.757334000 |
| 8  | -0.682559000 | 1.224271000  | -0.707034000 |
| 6  | -0.781349000 | -2.531503000 | -0.075066000 |
| 1  | -0.943396000 | -2.373839000 | 0.992713000  |
| 1  | -1.634391000 | -3.047013000 | -0.516578000 |
| 1  | 0.121595000  | -3.130348000 | -0.226882000 |
| 6  | -2.013137000 | 1.538865000  | -0.276709000 |
| 1  | -2.708174000 | 0.761146000  | -0.604023000 |
| 1  | -2.048069000 | 1.640737000  | 0.810346000  |

|   |              |             |              |
|---|--------------|-------------|--------------|
| 1 | -2.273047000 | 2.485698000 | -0.748467000 |
|---|--------------|-------------|--------------|

**PC<sub>2</sub>O<sub>3</sub>H<sub>6</sub>• (product of P-CH<sub>3</sub> bond cleavage reaction)**

|    |              |              |              |
|----|--------------|--------------|--------------|
| 15 | -0.665841000 | -0.262543000 | 0.234939000  |
| 8  | -1.236953000 | -0.397853000 | 1.618119000  |
| 8  | -0.751074000 | -1.580867000 | -0.724175000 |
| 8  | -1.434478000 | 0.762133000  | -0.777138000 |
| 6  | -0.444666000 | -2.875258000 | -0.163222000 |
| 1  | -1.040592000 | -3.057641000 | 0.734440000  |
| 1  | -0.698407000 | -3.598781000 | -0.938479000 |
| 1  | 0.621199000  | -2.951750000 | 0.073526000  |
| 6  | -1.879325000 | 2.040078000  | -0.274153000 |
| 1  | -2.492797000 | 1.910157000  | 0.620834000  |
| 1  | -1.024870000 | 2.686751000  | -0.051198000 |
| 1  | -2.470787000 | 2.481745000  | -1.076666000 |

**PC<sub>2</sub>O<sub>3</sub>H<sub>6</sub>• (product of PO-CH<sub>3</sub> bond cleavage reaction)**

|    |             |              |              |
|----|-------------|--------------|--------------|
| 15 | 0.068656000 | -0.052149000 | -0.140642000 |
| 8  | 0.070766000 | -0.183811000 | 1.396639000  |
| 6  | 1.705906000 | 0.119560000  | -0.867991000 |
| 1  | 1.626525000 | 0.175454000  | -1.956627000 |

|   |              |              |              |
|---|--------------|--------------|--------------|
| 1 | 2.187627000  | 1.026041000  | -0.492768000 |
| 1 | 2.299066000  | -0.753766000 | -0.587887000 |
| 8 | -0.683585000 | -1.328468000 | -0.571462000 |
| 8 | -0.652010000 | 1.294309000  | -0.647506000 |
| 6 | -2.026588000 | 1.570092000  | -0.280826000 |
| 1 | -2.682191000 | 0.786035000  | -0.666588000 |
| 1 | -2.118705000 | 1.637615000  | 0.805601000  |
| 1 | -2.271892000 | 2.527063000  | -0.740509000 |

**PC<sub>2</sub>O<sub>2</sub>H<sub>6</sub><sup>•</sup> (product of P-OCH<sub>3</sub> bond cleavage reaction)**

|    |              |              |              |
|----|--------------|--------------|--------------|
| 15 | 0.045528000  | -0.141238000 | -0.114822000 |
| 8  | 0.013838000  | -0.183235000 | 1.393366000  |
| 6  | 1.721467000  | 0.127511000  | -0.834951000 |
| 1  | 1.653997000  | 0.171740000  | -1.923908000 |
| 1  | 2.119821000  | 1.069403000  | -0.445458000 |
| 1  | 2.364149000  | -0.701039000 | -0.530547000 |
| 8  | -0.739423000 | 1.135349000  | -0.802936000 |
| 6  | -2.005818000 | 1.566864000  | -0.269021000 |
| 1  | -2.780228000 | 0.817126000  | -0.463159000 |
| 1  | -1.929353000 | 1.748224000  | 0.806186000  |
| 1  | -2.255657000 | 2.491739000  | -0.790602000 |

**TS for CH<sub>3</sub>OH elimination reaction**

|    |              |              |              |
|----|--------------|--------------|--------------|
| 15 | 0.398656000  | -0.364716000 | 0.181139000  |
| 8  | -0.080574000 | -0.113789000 | 1.566062000  |
| 6  | 1.591001000  | 0.474933000  | -0.722224000 |
| 1  | 0.099590000  | 0.951051000  | -1.268469000 |
| 1  | 2.182018000  | 1.172902000  | -0.133236000 |
| 1  | 2.164843000  | -0.135962000 | -1.415526000 |
| 8  | 0.190352000  | -1.837226000 | -0.427430000 |
| 8  | -0.893101000 | 0.546964000  | -0.949105000 |
| 6  | -0.991935000 | -2.602610000 | -0.107087000 |
| 1  | -1.160898000 | -2.615071000 | 0.972114000  |
| 1  | -1.857010000 | -2.174506000 | -0.622475000 |
| 1  | -0.803891000 | -3.612316000 | -0.472183000 |
| 6  | -1.832557000 | 1.480090000  | -0.370179000 |
| 1  | -2.326660000 | 0.989468000  | 0.469540000  |
| 1  | -1.310970000 | 2.371229000  | -0.008387000 |
| 1  | -2.557273000 | 1.751190000  | -1.140518000 |



**PC<sub>2</sub>O<sub>2</sub>H<sub>5</sub> (product of CH<sub>3</sub>OH elimination reaction)**

|    |              |              |              |
|----|--------------|--------------|--------------|
| 15 | 0.577909000  | -0.430400000 | 0.163868000  |
| 8  | -0.258689000 | 0.017449000  | 1.311013000  |
| 6  | 1.771954000  | 0.303738000  | -0.675683000 |
| 1  | 2.085227000  | 1.294111000  | -0.376543000 |
| 1  | 2.243292000  | -0.208254000 | -1.503027000 |
| 8  | 0.303815000  | -1.915960000 | -0.392674000 |
| 6  | -0.855244000 | -2.674243000 | 0.031173000  |
| 1  | -1.165577000 | -2.381196000 | 1.035685000  |
| 1  | -1.669881000 | -2.505270000 | -0.678024000 |
| 1  | -0.553873000 | -3.722025000 | 0.012894000  |

**DMMP on Mo<sub>3</sub>O<sub>9</sub>**

|    |              |              |              |
|----|--------------|--------------|--------------|
| 42 | 1.203503000  | -0.592091000 | -0.086827000 |
| 8  | 1.749425000  | 0.222574000  | -1.710002000 |
| 8  | 1.809204000  | -2.391944000 | -0.067582000 |
| 8  | -0.477974000 | -0.664389000 | -0.136252000 |
| 8  | 1.579696000  | 0.298593000  | 1.313511000  |
| 42 | 3.339570000  | -3.091849000 | -0.961369000 |
| 42 | 3.284385000  | -0.209550000 | -2.752504000 |
| 8  | 3.737924000  | -2.042527000 | -2.495908000 |
| 8  | 4.663295000  | -3.408638000 | 0.054390000  |
| 8  | 2.866344000  | -4.595700000 | -1.553782000 |
| 8  | 2.802748000  | -0.078271000 | -4.361001000 |
| 8  | 4.566425000  | 0.885912000  | -2.576406000 |
| 15 | 4.883637000  | 0.077802000  | 0.587317000  |
| 8  | 3.827998000  | -0.657736000 | -0.233568000 |
| 6  | 4.543660000  | 1.820505000  | 0.738267000  |
| 1  | 4.554324000  | 2.263868000  | -0.259613000 |
| 1  | 3.557961000  | 1.944464000  | 1.191761000  |
| 1  | 5.307189000  | 2.288526000  | 1.361312000  |

|   |             |              |              |
|---|-------------|--------------|--------------|
| 8 | 5.059299000 | -0.549978000 | 2.035354000  |
| 8 | 6.338887000 | 0.041198000  | -0.025097000 |
| 6 | 4.092923000 | -1.366940000 | 2.729069000  |
| 1 | 4.012179000 | -2.334224000 | 2.232905000  |
| 1 | 4.490888000 | -1.496026000 | 3.734258000  |
| 1 | 3.125241000 | -0.865734000 | 2.768885000  |
| 6 | 7.051818000 | -1.180794000 | -0.301233000 |
| 1 | 8.073908000 | -0.882113000 | -0.526275000 |
| 1 | 7.029801000 | -1.839541000 | 0.568044000  |
| 1 | 6.608260000 | -1.680160000 | -1.163392000 |

**Mo<sub>3</sub>O<sub>9</sub>-PC<sub>2</sub>O<sub>3</sub>H<sub>6</sub>• (product of P-CH<sub>3</sub> bond cleavage reaction)**

|    |              |              |              |
|----|--------------|--------------|--------------|
| 42 | 1.187464000  | -1.152281000 | -0.152467000 |
| 8  | 1.837851000  | 0.016463000  | -1.500739000 |
| 8  | 1.910082000  | -2.880484000 | -0.445806000 |
| 8  | -0.474775000 | -1.278525000 | -0.382869000 |
| 8  | 1.382397000  | -0.566008000 | 1.428076000  |
| 42 | 3.467291000  | -3.377794000 | -1.416859000 |
| 42 | 3.399883000  | -0.153569000 | -2.564279000 |
| 8  | 3.867536000  | -1.990572000 | -2.656898000 |
| 8  | 4.800845000  | -3.834972000 | -0.479053000 |
| 8  | 3.063182000  | -4.739191000 | -2.321263000 |
| 8  | 2.982502000  | 0.321136000  | -4.124089000 |
| 8  | 4.689967000  | 0.853324000  | -2.108471000 |
| 15 | 4.941314000  | -0.481914000 | 0.852519000  |
| 8  | 3.903724000  | -1.082543000 | -0.086835000 |
| 8  | 4.875240000  | -0.951016000 | 2.373466000  |
| 8  | 6.443993000  | -0.879968000 | 0.530476000  |
| 6  | 3.952158000  | -0.418825000 | 3.352614000  |
| 1  | 2.924726000  | -0.501075000 | 3.000052000  |

|   |             |              |              |
|---|-------------|--------------|--------------|
| 1 | 4.102370000 | -1.028213000 | 4.241816000  |
| 1 | 4.207524000 | 0.620154000  | 3.569311000  |
| 6 | 6.956436000 | -1.183043000 | -0.786072000 |
| 1 | 8.036629000 | -1.239454000 | -0.665712000 |
| 1 | 6.561946000 | -2.146925000 | -1.107885000 |
| 1 | 6.694548000 | -0.392599000 | -1.490012000 |

**Mo<sub>3</sub>O<sub>9</sub>-PC<sub>2</sub>O<sub>3</sub>H<sub>6</sub>• (product of PO-CH<sub>3</sub> bond cleavage reaction)**

|    |              |              |              |
|----|--------------|--------------|--------------|
| 42 | 1.218340000  | -0.617866000 | -0.041150000 |
| 8  | 1.705573000  | 0.172094000  | -1.701476000 |
| 8  | 1.883198000  | -2.394970000 | -0.021681000 |
| 8  | -0.461654000 | -0.716711000 | -0.013240000 |
| 8  | 1.646303000  | 0.329442000  | 1.299617000  |
| 42 | 3.349230000  | -3.120277000 | -0.993436000 |
| 42 | 3.181073000  | -0.231566000 | -2.824488000 |
| 8  | 3.654503000  | -2.046258000 | -2.538083000 |
| 8  | 4.745560000  | -3.429650000 | -0.085085000 |
| 8  | 2.843948000  | -4.622953000 | -1.559014000 |
| 8  | 2.655650000  | -0.094976000 | -4.418130000 |
| 8  | 4.469960000  | 0.861898000  | -2.665456000 |
| 15 | 4.907325000  | 0.133012000  | 0.567371000  |
| 8  | 3.899307000  | -0.632302000 | -0.265670000 |
| 6  | 4.592301000  | 1.878037000  | 0.704848000  |
| 1  | 4.661490000  | 2.321741000  | -0.291039000 |
| 1  | 3.586376000  | 2.008462000  | 1.109204000  |
| 1  | 5.327184000  | 2.338998000  | 1.367402000  |

|   |             |              |              |
|---|-------------|--------------|--------------|
| 8 | 4.842955000 | -0.589938000 | 2.002095000  |
| 8 | 6.415379000 | 0.051715000  | 0.113838000  |
| 6 | 7.082221000 | -1.189605000 | -0.225974000 |
| 1 | 8.146652000 | -0.992426000 | -0.117362000 |
| 1 | 6.763892000 | -1.992450000 | 0.439072000  |
| 1 | 6.844986000 | -1.439954000 | -1.260271000 |

**Mo<sub>3</sub>O<sub>9</sub>-PC<sub>2</sub>O<sub>2</sub>H<sub>6</sub>• (product of P-OCH<sub>3</sub> bond cleavage reaction)**

|    |              |              |              |
|----|--------------|--------------|--------------|
| 42 | 1.224808000  | -0.544101000 | -0.147791000 |
| 8  | 1.826209000  | 0.174242000  | -1.803427000 |
| 8  | 1.807631000  | -2.347107000 | -0.017254000 |
| 8  | -0.455722000 | -0.590049000 | -0.230913000 |
| 8  | 1.588590000  | 0.422319000  | 1.200980000  |
| 42 | 3.334874000  | -3.128853000 | -0.838072000 |
| 42 | 3.359390000  | -0.343265000 | -2.802311000 |
| 8  | 3.740823000  | -2.168421000 | -2.431946000 |
| 8  | 4.663715000  | -3.371978000 | 0.189657000  |
| 8  | 2.864438000  | -4.668201000 | -1.330855000 |
| 8  | 2.924803000  | -0.264183000 | -4.427339000 |
| 8  | 4.695329000  | 0.691628000  | -2.635486000 |
| 15 | 4.827835000  | 0.041355000  | 0.723798000  |
| 8  | 3.857712000  | -0.632035000 | -0.251177000 |
| 6  | 4.532442000  | 1.823486000  | 0.889483000  |
| 1  | 4.617695000  | 2.259684000  | -0.110376000 |
| 1  | 3.528644000  | 1.969292000  | 1.290350000  |

|   |             |              |              |
|---|-------------|--------------|--------------|
| 1 | 5.282223000 | 2.254196000  | 1.554268000  |
| 8 | 6.361084000 | -0.014083000 | 0.275868000  |
| 6 | 6.953824000 | -1.075261000 | -0.504383000 |
| 1 | 8.029098000 | -0.917401000 | -0.446757000 |
| 1 | 6.685883000 | -2.049792000 | -0.094405000 |
| 1 | 6.612893000 | -0.984906000 | -1.536831000 |

**TS for CH<sub>3</sub>OH elimination reaction**

|    |              |              |              |
|----|--------------|--------------|--------------|
| 42 | 1.034983000  | -0.793296000 | -0.043874000 |
| 8  | 1.440789000  | 0.176997000  | -1.624886000 |
| 8  | 1.806012000  | -2.531369000 | -0.176554000 |
| 8  | -0.633363000 | -1.020420000 | -0.042537000 |
| 8  | 1.385186000  | -0.000192000 | 1.415262000  |
| 42 | 3.342035000  | -3.038737000 | -1.168468000 |
| 42 | 2.937179000  | -0.059658000 | -2.775567000 |
| 8  | 3.545660000  | -1.862925000 | -2.637688000 |
| 8  | 4.741724000  | -3.263293000 | -0.223120000 |
| 8  | 2.996351000  | -4.551007000 | -1.822998000 |
| 8  | 2.358484000  | 0.120473000  | -4.346528000 |
| 8  | 4.148350000  | 1.111806000  | -2.604735000 |
| 15 | 4.627445000  | 0.201845000  | 0.563806000  |
| 8  | 3.641532000  | -0.587262000 | -0.277327000 |
| 6  | 4.997585000  | 1.849080000  | 0.477095000  |
| 1  | 4.556652000  | 2.381940000  | -0.359601000 |
| 1  | 4.997876000  | 2.367312000  | 1.431041000  |
| 1  | 6.354769000  | 0.924311000  | -0.017739000 |

|   |             |              |              |
|---|-------------|--------------|--------------|
| 8 | 4.868903000 | -0.383898000 | 2.013316000  |
| 8 | 6.236937000 | -0.157433000 | -0.180456000 |
| 6 | 4.141541000 | -1.484564000 | 2.607848000  |
| 1 | 4.292795000 | -2.391466000 | 2.022058000  |
| 1 | 4.565723000 | -1.601333000 | 3.603466000  |
| 1 | 3.083929000 | -1.229911000 | 2.676140000  |
| 6 | 7.197030000 | -1.169877000 | 0.214818000  |
| 1 | 8.050427000 | -1.072872000 | -0.454541000 |
| 1 | 7.490434000 | -1.011585000 | 1.253455000  |
| 1 | 6.715592000 | -2.138039000 | 0.085581000  |

**Mo<sub>3</sub>O<sub>9</sub>-PC<sub>2</sub>O<sub>2</sub>H<sub>5</sub> (product of CH<sub>3</sub>OH elimination reaction)**

|    |              |              |              |
|----|--------------|--------------|--------------|
| 42 | 0.933332000  | -0.916862000 | -0.159252000 |
| 8  | 1.423581000  | 0.029627000  | -1.727806000 |
| 8  | 1.835716000  | -2.588155000 | -0.181756000 |
| 8  | -0.715247000 | -1.239719000 | -0.260621000 |
| 8  | 1.149450000  | -0.058040000 | 1.290763000  |
| 42 | 3.485444000  | -3.035829000 | -1.016889000 |
| 42 | 3.012727000  | -0.122556000 | -2.763288000 |
| 8  | 3.732613000  | -1.860396000 | -2.485737000 |
| 8  | 4.786323000  | -3.116420000 | 0.069098000  |
| 8  | 3.317717000  | -4.588780000 | -1.643508000 |
| 8  | 2.557838000  | -0.030633000 | -4.380592000 |
| 8  | 4.116516000  | 1.141209000  | -2.527120000 |
| 15 | 4.389031000  | 0.338096000  | 0.795952000  |
| 8  | 3.569204000  | -0.502764000 | -0.150867000 |
| 6  | 5.178997000  | 1.711131000  | 0.484695000  |
| 1  | 5.145239000  | 2.097024000  | -0.525409000 |
| 1  | 5.722894000  | 2.208406000  | 1.275259000  |

|   |             |              |             |
|---|-------------|--------------|-------------|
| 8 | 4.512994000 | -0.188944000 | 2.270898000 |
| 6 | 3.833888000 | -1.350112000 | 2.813720000 |
| 1 | 4.126706000 | -2.239073000 | 2.255319000 |
| 1 | 4.177621000 | -1.416362000 | 3.843765000 |
| 1 | 2.756421000 | -1.190008000 | 2.778800000 |

**DMMP on Mo<sub>3</sub>O<sub>8</sub>**

|    |              |              |              |
|----|--------------|--------------|--------------|
| 42 | 0.951133000  | -0.189253000 | -0.190217000 |
| 8  | 1.631530000  | 0.187217000  | -2.021123000 |
| 8  | 1.248970000  | -2.162799000 | -0.054521000 |
| 8  | -0.045378000 | 0.781106000  | 0.748673000  |
| 42 | 2.830012000  | -3.028820000 | -0.451262000 |
| 42 | 3.261341000  | -0.357961000 | -2.708170000 |
| 8  | 3.545548000  | -2.068364000 | -1.922952000 |
| 8  | 3.908651000  | -2.962502000 | 0.875512000  |
| 8  | 2.533345000  | -4.654903000 | -0.817893000 |
| 8  | 3.196952000  | -0.422508000 | -4.398903000 |
| 8  | 4.516089000  | 0.706323000  | -2.261183000 |
| 15 | 3.500904000  | 0.795241000  | 1.801502000  |
| 8  | 2.870280000  | 0.126673000  | 0.585094000  |
| 6  | 3.104934000  | 2.527841000  | 1.929791000  |
| 1  | 3.424658000  | 3.028662000  | 1.013818000  |
| 1  | 2.025222000  | 2.639144000  | 2.051156000  |
| 1  | 3.619612000  | 2.961027000  | 2.788721000  |
| 8  | 3.010118000  | 0.206795000  | 3.184100000  |

|   |             |              |              |
|---|-------------|--------------|--------------|
| 8 | 5.068656000 | 0.641527000  | 1.743863000  |
| 6 | 3.340273000 | -1.132719000 | 3.624982000  |
| 1 | 4.364723000 | -1.138609000 | 4.000857000  |
| 1 | 2.642622000 | -1.360404000 | 4.428400000  |
| 1 | 3.235191000 | -1.850023000 | 2.809472000  |
| 6 | 5.807667000 | -0.114565000 | 0.744543000  |
| 1 | 6.855112000 | 0.028287000  | 1.002664000  |
| 1 | 5.535177000 | -1.168517000 | 0.807996000  |
| 1 | 5.597452000 | 0.282058000  | -0.248979000 |

**Mo<sub>3</sub>O<sub>8</sub>-PC<sub>2</sub>O<sub>3</sub>H<sub>6</sub>• (product of P-CH<sub>3</sub> bond cleavage reaction)**

|    |              |              |              |
|----|--------------|--------------|--------------|
| 42 | 1.592759000  | -0.604548000 | -0.213537000 |
| 8  | 2.110101000  | 0.045514000  | -1.942141000 |
| 8  | 2.479257000  | -2.298072000 | -0.436610000 |
| 8  | -0.067226000 | -0.834653000 | -0.156615000 |
| 42 | 3.556402000  | -3.270174000 | -1.627991000 |
| 42 | 2.881707000  | -0.482524000 | -3.573940000 |
| 8  | 3.618274000  | -2.185633000 | -3.175690000 |
| 8  | 5.096829000  | -3.497219000 | -0.962306000 |
| 8  | 2.900337000  | -4.792160000 | -1.952951000 |
| 8  | 1.719490000  | -0.593401000 | -4.794449000 |
| 8  | 4.060649000  | 0.615218000  | -4.080401000 |
| 15 | 3.885329000  | 1.220422000  | 1.384265000  |
| 8  | 2.393478000  | 0.416106000  | 1.129893000  |
| 8  | 3.873465000  | 1.232361000  | 3.004991000  |
| 8  | 4.899619000  | 0.022298000  | 0.950113000  |
| 6  | 3.203374000  | 0.361434000  | 3.922234000  |
| 1  | 3.795389000  | -0.539797000 | 4.097657000  |



|   |             |              |             |
|---|-------------|--------------|-------------|
| 1 | 3.101097000 | 0.915274000  | 4.855358000 |
| 1 | 2.215528000 | 0.092439000  | 3.543842000 |
| 6 | 5.144597000 | -1.196078000 | 1.665424000 |
| 1 | 5.769253000 | -1.816575000 | 1.024156000 |
| 1 | 5.670745000 | -0.978929000 | 2.597945000 |
| 1 | 4.210701000 | -1.726123000 | 1.873749000 |

**Mo<sub>3</sub>O<sub>8</sub>-PC<sub>2</sub>O<sub>3</sub>H<sub>6</sub>• (product of PO-CH<sub>3</sub> bond cleavage reaction)**

|    |              |              |              |
|----|--------------|--------------|--------------|
| 42 | 0.864715000  | 0.072152000  | -0.346043000 |
| 8  | 2.162573000  | 0.464619000  | -1.687860000 |
| 8  | 0.983314000  | -1.781390000 | -0.027562000 |
| 8  | -0.639405000 | 0.737700000  | -0.666444000 |
| 42 | 2.628483000  | -2.792161000 | 0.058572000  |
| 42 | 3.936751000  | -0.237530000 | -1.767232000 |
| 8  | 3.879742000  | -2.037919000 | -1.145453000 |
| 8  | 3.173419000  | -3.105792000 | 1.631652000  |
| 8  | 2.234590000  | -4.300355000 | -0.578244000 |
| 8  | 4.319234000  | -0.317486000 | -3.405705000 |
| 8  | 5.113585000  | 0.772956000  | -1.081301000 |
| 15 | 2.822492000  | 0.815736000  | 1.683428000  |
| 8  | 1.363541000  | 1.230521000  | 1.237155000  |
| 6  | 3.938680000  | 2.202549000  | 1.617620000  |
| 1  | 4.017741000  | 2.550224000  | 0.586839000  |
| 1  | 3.564154000  | 3.000692000  | 2.260799000  |
| 1  | 4.924872000  | 1.880946000  | 1.957241000  |

|   |             |              |             |
|---|-------------|--------------|-------------|
| 8 | 2.825567000 | 0.429235000  | 3.216832000 |
| 8 | 3.167385000 | -0.338192000 | 0.736552000 |
| 6 | 2.049046000 | -0.664605000 | 3.751898000 |
| 1 | 2.383162000 | -1.606461000 | 3.314180000 |
| 1 | 2.234688000 | -0.661433000 | 4.824229000 |
| 1 | 0.987279000 | -0.493805000 | 3.560746000 |

**Mo<sub>3</sub>O<sub>8</sub>-PC<sub>2</sub>O<sub>2</sub>H<sub>6</sub>• (product of P-OCH<sub>3</sub> bond cleavage reaction)**

|    |             |              |              |
|----|-------------|--------------|--------------|
| 42 | 1.727853000 | -0.771994000 | 0.117974000  |
| 8  | 2.532959000 | -0.021939000 | -1.460497000 |
| 8  | 2.606899000 | -2.464170000 | -0.130069000 |
| 8  | 0.081161000 | -0.965250000 | -0.127271000 |
| 42 | 3.552754000 | -3.505059000 | -1.373006000 |
| 42 | 3.498135000 | -0.450299000 | -3.012310000 |
| 8  | 3.950725000 | -2.271914000 | -2.756244000 |
| 8  | 4.955228000 | -4.149791000 | -0.683503000 |
| 8  | 2.614152000 | -4.789309000 | -1.944116000 |
| 8  | 2.561709000 | -0.234594000 | -4.402568000 |
| 8  | 4.873829000 | 0.523052000  | -3.152666000 |
| 15 | 2.954833000 | 0.654854000  | 3.118426000  |
| 8  | 2.297896000 | 0.065879000  | 1.677032000  |
| 6  | 3.887715000 | 2.050894000  | 2.401929000  |
| 1  | 4.694221000 | 1.668829000  | 1.771265000  |
| 1  | 3.225087000 | 2.690622000  | 1.813919000  |
| 1  | 4.325814000 | 2.635681000  | 3.214967000  |
| 8  | 1.714576000 | 1.554537000  | 3.702341000  |

|   |              |             |             |
|---|--------------|-------------|-------------|
| 6 | 0.731718000  | 0.927980000 | 4.530760000 |
| 1 | 1.191713000  | 0.211235000 | 5.219075000 |
| 1 | 0.246425000  | 1.719900000 | 5.101507000 |
| 1 | -0.014623000 | 0.418413000 | 3.914634000 |

**DMMP on Mo<sub>3</sub>O<sub>8</sub>: TS for CH<sub>3</sub>OH elimination reaction**

|    |              |              |              |
|----|--------------|--------------|--------------|
| 42 | 1.185451000  | 0.037819000  | -0.574469000 |
| 8  | 2.221641000  | 0.113159000  | -2.221539000 |
| 8  | 1.303636000  | -1.941884000 | -0.209201000 |
| 8  | -0.298167000 | 0.709486000  | -0.188519000 |
| 42 | 2.700946000  | -3.093697000 | -0.377445000 |
| 42 | 3.514897000  | -0.990469000 | -3.020524000 |
| 8  | 3.355974000  | -2.635327000 | -2.120778000 |
| 8  | 3.928529000  | -2.727986000 | 0.770201000  |
| 8  | 2.205137000  | -4.703624000 | -0.188708000 |
| 8  | 3.271421000  | -1.148265000 | -4.687189000 |
| 8  | 5.056909000  | -0.324711000 | -2.757109000 |
| 15 | 3.442280000  | 1.132029000  | 1.728834000  |
| 8  | 2.468435000  | 0.158500000  | 1.079921000  |
| 6  | 2.986217000  | 2.459938000  | 2.669972000  |
| 1  | 3.643553000  | 3.323296000  | 2.633051000  |
| 1  | 1.923017000  | 2.684602000  | 2.662361000  |
| 1  | 3.471584000  | 1.161397000  | 3.662762000  |
| 8  | 3.882701000  | 0.230132000  | 3.214084000  |

|   |             |              |              |
|---|-------------|--------------|--------------|
| 8 | 4.823516000 | 1.282591000  | 1.004260000  |
| 6 | 3.409698000 | -1.103569000 | 3.573610000  |
| 1 | 3.646549000 | -1.770813000 | 2.745823000  |
| 1 | 3.947612000 | -1.386641000 | 4.476548000  |
| 1 | 2.333565000 | -1.070644000 | 3.745447000  |
| 6 | 5.664950000 | 0.174940000  | 0.571454000  |
| 1 | 6.566852000 | 0.204276000  | 1.182358000  |
| 1 | 5.150776000 | -0.780987000 | 0.687365000  |
| 1 | 5.897441000 | 0.347828000  | -0.478078000 |

**Mo<sub>3</sub>O<sub>8</sub>-PC<sub>2</sub>O<sub>2</sub>H<sub>5</sub> (product of CH<sub>3</sub>OH elimination reaction)**

|    |             |              |              |
|----|-------------|--------------|--------------|
| 42 | 3.652969000 | 0.132935000  | -0.942963000 |
| 8  | 3.179688000 | -0.753856000 | -2.568985000 |
| 8  | 2.860821000 | -1.351588000 | 0.095404000  |
| 8  | 2.908658000 | 1.652195000  | -1.060410000 |
| 42 | 2.012659000 | -3.011628000 | -0.042209000 |
| 42 | 2.268176000 | -2.177284000 | -3.393000000 |
| 8  | 1.772600000 | -3.238809000 | -1.908843000 |
| 8  | 2.974555000 | -4.234357000 | 0.620780000  |
| 8  | 0.542863000 | -3.005933000 | 0.794283000  |
| 8  | 0.916425000 | -1.640764000 | -4.251450000 |
| 8  | 3.258381000 | -3.018101000 | -4.471695000 |
| 15 | 3.996962000 | 0.779440000  | 1.653102000  |
| 8  | 5.327888000 | 0.367828000  | -1.065024000 |
| 6  | 3.551729000 | -0.007966000 | 3.011340000  |
| 1  | 3.750775000 | 0.375405000  | 4.005778000  |
| 1  | 3.035718000 | -0.953841000 | 2.903323000  |
| 8  | 4.742256000 | 2.153490000  | 2.046333000  |
| 6  | 5.233488000 | 3.053904000  | 1.032420000  |

|   |             |             |             |
|---|-------------|-------------|-------------|
| 1 | 5.683815000 | 3.884643000 | 1.572923000 |
| 1 | 5.983931000 | 2.558926000 | 0.412631000 |
| 1 | 4.411373000 | 3.413393000 | 0.410063000 |

### DMMP on Mo<sub>3</sub>O<sub>9</sub>H

|    |              |              |              |
|----|--------------|--------------|--------------|
| 42 | 1.175635000  | -0.554836000 | -0.121469000 |
| 8  | 1.757963000  | 0.156233000  | -1.745125000 |
| 8  | 1.755563000  | -2.362675000 | 0.001793000  |
| 8  | -0.510983000 | -0.564079000 | -0.146331000 |
| 8  | 1.630003000  | 0.376645000  | 1.239069000  |
| 42 | 3.130548000  | -3.179921000 | -1.016502000 |
| 42 | 3.335752000  | -0.206910000 | -2.835226000 |
| 8  | 3.400881000  | -2.116731000 | -2.527759000 |
| 8  | 4.558075000  | -3.432427000 | -0.114872000 |
| 8  | 2.599736000  | -4.700498000 | -1.519582000 |
| 8  | 2.747687000  | -0.092588000 | -4.398040000 |
| 15 | 4.862523000  | 0.139717000  | 0.583007000  |
| 8  | 3.875960000  | -0.566972000 | -0.319416000 |
| 6  | 4.496774000  | 1.864979000  | 0.854984000  |
| 1  | 4.507197000  | 2.397108000  | -0.098729000 |
| 1  | 3.499005000  | 1.930418000  | 1.294805000  |
| 1  | 5.239860000  | 2.297445000  | 1.526673000  |

|   |             |              |              |
|---|-------------|--------------|--------------|
| 8 | 5.087559000 | -0.560033000 | 1.983139000  |
| 8 | 6.320754000 | 0.175797000  | -0.084234000 |
| 6 | 4.158661000 | -1.475296000 | 2.615801000  |
| 1 | 4.143681000 | -2.411610000 | 2.058897000  |
| 1 | 4.551144000 | -1.634605000 | 3.618408000  |
| 1 | 3.164984000 | -1.028458000 | 2.664038000  |
| 6 | 7.123733000 | -1.032086000 | -0.145901000 |
| 1 | 7.922036000 | -0.824688000 | -0.856210000 |
| 1 | 7.538511000 | -1.231543000 | 0.842462000  |
| 1 | 6.520677000 | -1.879675000 | -0.478525000 |
| 8 | 4.967837000 | 0.709259000  | -2.674594000 |
| 1 | 5.609804000 | 0.648093000  | -1.946382000 |

**Mo<sub>3</sub>O<sub>9</sub>H -PC<sub>2</sub>O<sub>3</sub>H<sub>6</sub>• (product of P-CH<sub>3</sub> bond cleavage reaction)**

|    |              |              |              |
|----|--------------|--------------|--------------|
| 42 | 1.300010000  | -0.574982000 | -0.208200000 |
| 8  | 1.866205000  | 0.280239000  | -1.905799000 |
| 8  | 1.694175000  | -2.437113000 | -0.093700000 |
| 8  | -0.371401000 | -0.552335000 | -0.430762000 |
| 8  | 1.562470000  | 0.274171000  | 1.228808000  |
| 42 | 3.225594000  | -3.093104000 | -1.016850000 |
| 42 | 3.415060000  | -0.249892000 | -2.752334000 |
| 8  | 3.602942000  | -2.074354000 | -2.676738000 |
| 8  | 4.539476000  | -3.560910000 | -0.067158000 |
| 8  | 2.662596000  | -4.528106000 | -1.699016000 |
| 8  | 3.106814000  | 0.080141000  | -4.364566000 |
| 15 | 4.599630000  | 0.041253000  | 0.650905000  |
| 8  | 3.661709000  | -0.790694000 | -0.431641000 |
| 8  | 5.063135000  | -1.113803000 | 1.704726000  |
| 8  | 6.027978000  | 0.082935000  | -0.226427000 |
| 6  | 4.248335000  | -1.403262000 | 2.846238000  |
| 1  | 3.457427000  | -2.107164000 | 2.574067000  |

|   |             |              |              |
|---|-------------|--------------|--------------|
| 1 | 4.899846000 | -1.861465000 | 3.589951000  |
| 1 | 3.802968000 | -0.492358000 | 3.257556000  |
| 6 | 6.973559000 | -1.008981000 | -0.282076000 |
| 1 | 7.726134000 | -0.721877000 | -1.016360000 |
| 1 | 7.431840000 | -1.137229000 | 0.697941000  |
| 1 | 6.482167000 | -1.938094000 | -0.575258000 |
| 8 | 4.961907000 | 0.690155000  | -2.492147000 |
| 1 | 5.488150000 | 0.546941000  | -1.634713000 |

**Mo<sub>3</sub>O<sub>9</sub>H -PC<sub>2</sub>O<sub>3</sub>H<sub>6</sub>• (product of PO-CH<sub>3</sub> bond cleavage reaction)**

|    |              |              |              |
|----|--------------|--------------|--------------|
| 42 | 1.144935000  | -0.495204000 | -0.172279000 |
| 8  | 1.771781000  | 0.320673000  | -1.787064000 |
| 8  | 1.630581000  | -2.331213000 | -0.149223000 |
| 8  | -0.533292000 | -0.479768000 | -0.298536000 |
| 8  | 1.489964000  | 0.350259000  | 1.260651000  |
| 42 | 3.138213000  | -3.108110000 | -1.012499000 |
| 42 | 3.283581000  | -0.212904000 | -2.793800000 |
| 8  | 3.571798000  | -2.059283000 | -2.556933000 |
| 8  | 4.426033000  | -3.482922000 | 0.020199000  |
| 8  | 2.608026000  | -4.589104000 | -1.610207000 |
| 8  | 2.869603000  | 0.004088000  | -4.409218000 |
| 15 | 4.805336000  | 0.082078000  | 0.479338000  |
| 8  | 3.697136000  | -0.673088000 | -0.253191000 |
| 6  | 4.362723000  | 1.791732000  | 0.764813000  |
| 1  | 4.219059000  | 2.292875000  | -0.195303000 |
| 1  | 3.436068000  | 1.835193000  | 1.340378000  |
| 1  | 5.170959000  | 2.279401000  | 1.313053000  |
| 8  | 5.209697000  | -0.552353000 | 1.863788000  |

|   |             |              |              |
|---|-------------|--------------|--------------|
| 8 | 6.180209000 | 0.049649000  | -0.310502000 |
| 6 | 4.354333000 | -1.416884000 | 2.644195000  |
| 1 | 4.299757000 | -2.394799000 | 2.166435000  |
| 1 | 4.834401000 | -1.497461000 | 3.617581000  |
| 1 | 3.359956000 | -0.978682000 | 2.752021000  |
| 8 | 4.685874000 | 0.743010000  | -2.542024000 |
| 1 | 6.049871000 | 0.330873000  | -1.239319000 |

**Mo<sub>3</sub>O<sub>9</sub>H -PC<sub>2</sub>O<sub>2</sub>H<sub>6</sub>• (product of P-OCH<sub>3</sub> bond cleavage reaction)**

|    |              |              |              |
|----|--------------|--------------|--------------|
| 42 | 1.285323000  | -0.476634000 | -0.100141000 |
| 8  | 1.828810000  | 0.320388000  | -1.825928000 |
| 8  | 1.705254000  | -2.329791000 | 0.071105000  |
| 8  | -0.387114000 | -0.491069000 | -0.308970000 |
| 8  | 1.539250000  | 0.446212000  | 1.292682000  |
| 42 | 3.245655000  | -3.011147000 | -0.808728000 |
| 42 | 3.366476000  | -0.259229000 | -2.674086000 |
| 8  | 3.545642000  | -2.084411000 | -2.529917000 |
| 8  | 4.615985000  | -3.320071000 | 0.131448000  |
| 8  | 2.749539000  | -4.527089000 | -1.352936000 |
| 8  | 3.014213000  | 0.008538000  | -4.290056000 |
| 15 | 4.763241000  | -0.115915000 | 0.735242000  |
| 8  | 3.653663000  | -0.673989000 | -0.365870000 |
| 6  | 4.396469000  | 1.679620000  | 0.757859000  |
| 1  | 4.305638000  | 2.103639000  | -0.246078000 |
| 1  | 3.474847000  | 1.855821000  | 1.314813000  |
| 1  | 5.219997000  | 2.177926000  | 1.277097000  |
| 8  | 6.095885000  | 0.060919000  | -0.320464000 |



|   |             |              |              |
|---|-------------|--------------|--------------|
| 6 | 7.109795000 | -0.959480000 | -0.322620000 |
| 1 | 7.921883000 | -0.596428000 | -0.952860000 |
| 1 | 7.475872000 | -1.117314000 | 0.693912000  |
| 1 | 6.718657000 | -1.900928000 | -0.715920000 |
| 8 | 4.928543000 | 0.666895000  | -2.493639000 |
| 1 | 5.492007000 | 0.493601000  | -1.652048000 |

**DMMP on Mo<sub>3</sub>O<sub>9</sub>H: TS for intramolecular CH<sub>3</sub>OH elimination reaction**

|    |              |              |              |
|----|--------------|--------------|--------------|
| 42 | 1.179304000  | -0.589663000 | -0.142754000 |
| 8  | 1.752712000  | 0.080755000  | -1.787876000 |
| 8  | 1.786675000  | -2.388906000 | 0.019087000  |
| 8  | -0.507228000 | -0.612449000 | -0.149844000 |
| 8  | 1.642656000  | 0.359696000  | 1.196765000  |
| 42 | 3.135424000  | -3.243480000 | -0.994050000 |
| 42 | 3.293037000  | -0.307098000 | -2.914004000 |
| 8  | 3.399330000  | -2.199491000 | -2.515150000 |
| 8  | 4.569582000  | -3.466350000 | -0.091834000 |
| 8  | 2.601195000  | -4.775185000 | -1.458714000 |
| 8  | 2.655774000  | -0.280446000 | -4.459983000 |
| 15 | 4.876248000  | 0.348035000  | 0.393207000  |
| 8  | 3.919654000  | -0.544536000 | -0.356318000 |
| 6  | 4.607295000  | 1.878972000  | 1.047548000  |
| 1  | 5.402264000  | 2.606157000  | 0.917629000  |
| 1  | 3.588946000  | 2.245877000  | 0.960799000  |
| 1  | 4.755336000  | 0.707287000  | 2.293479000  |
| 8  | 4.993708000  | -0.346279000 | 2.053293000  |

|   |             |              |              |
|---|-------------|--------------|--------------|
| 8 | 6.376184000 | 0.183239000  | -0.122503000 |
| 6 | 4.219163000 | -1.465384000 | 2.579508000  |
| 1 | 4.406380000 | -2.320234000 | 1.931882000  |
| 1 | 4.589724000 | -1.649993000 | 3.586424000  |
| 1 | 3.163097000 | -1.196265000 | 2.585483000  |
| 6 | 7.051396000 | -1.099468000 | -0.093546000 |
| 1 | 7.907731000 | -1.002969000 | -0.758282000 |
| 1 | 7.388026000 | -1.293648000 | 0.926320000  |
| 1 | 6.386192000 | -1.896709000 | -0.430881000 |
| 8 | 4.919964000 | 0.626095000  | -2.858180000 |
| 1 | 5.605273000 | 0.658506000  | -2.172737000 |

**Mo<sub>3</sub>O<sub>9</sub>H-PC<sub>2</sub>O<sub>2</sub>H<sub>5</sub> (product of intramolecular CH<sub>3</sub>OH elimination reaction)**

|    |              |              |              |
|----|--------------|--------------|--------------|
| 42 | 1.269158000  | -0.445278000 | -0.177506000 |
| 8  | 1.818278000  | 0.295329000  | -1.921665000 |
| 8  | 1.665000000  | -2.299260000 | 0.033044000  |
| 8  | -0.405868000 | -0.433247000 | -0.361405000 |
| 8  | 1.564001000  | 0.510798000  | 1.185230000  |
| 42 | 3.198280000  | -3.022147000 | -0.828337000 |
| 42 | 3.351227000  | -0.316514000 | -2.758571000 |
| 8  | 3.510050000  | -2.139757000 | -2.572605000 |
| 8  | 4.560872000  | -3.332405000 | 0.123035000  |
| 8  | 2.678493000  | -4.541193000 | -1.341045000 |
| 8  | 2.995812000  | -0.086166000 | -4.379431000 |
| 15 | 4.745639000  | -0.071366000 | 0.618024000  |
| 8  | 3.640258000  | -0.694800000 | -0.447691000 |
| 6  | 4.398769000  | 1.672718000  | 0.605214000  |
| 1  | 5.229143000  | 2.372371000  | 0.573994000  |
| 1  | 3.436910000  | 2.034809000  | 0.951509000  |
| 8  | 6.099230000  | 0.041489000  | -0.405019000 |

|   |             |              |              |
|---|-------------|--------------|--------------|
| 6 | 7.097753000 | -0.992704000 | -0.334612000 |
| 1 | 7.915878000 | -0.682518000 | -0.984626000 |
| 1 | 7.459088000 | -1.087604000 | 0.691512000  |
| 1 | 6.693811000 | -1.951721000 | -0.667430000 |
| 8 | 4.928274000 | 0.592265000  | -2.615708000 |
| 1 | 5.489763000 | 0.458333000  | -1.774755000 |

**DMMP on Mo<sub>3</sub>O<sub>9</sub>H: TS for intermolecular CH<sub>3</sub>OH elimination reaction**

|    |              |              |              |
|----|--------------|--------------|--------------|
| 42 | 1.495359000  | -0.869305000 | 0.024682000  |
| 8  | 1.529266000  | -0.088729000 | -1.584826000 |
| 8  | 1.802213000  | -2.682645000 | -0.200095000 |
| 8  | -0.058723000 | -0.694731000 | 0.646058000  |
| 8  | 2.601036000  | -0.027752000 | 1.279015000  |
| 42 | 3.141170000  | -3.369798000 | -1.447137000 |
| 42 | 3.271126000  | -0.174756000 | -2.809633000 |
| 8  | 3.214036000  | -2.149623000 | -2.829491000 |
| 8  | 4.645655000  | -3.659127000 | -0.708699000 |
| 8  | 2.592980000  | -4.848846000 | -2.046391000 |
| 8  | 2.544837000  | 0.383815000  | -4.223033000 |
| 15 | 4.220391000  | 0.132018000  | 0.561376000  |
| 8  | 3.742992000  | -0.828471000 | -0.582942000 |
| 6  | 4.033570000  | 1.935706000  | 0.519163000  |
| 1  | 3.243307000  | 2.198212000  | -0.187747000 |
| 1  | 3.711486000  | 2.253112000  | 1.511860000  |
| 1  | 4.961524000  | 2.427683000  | 0.237886000  |
| 8  | 5.019485000  | -0.442196000 | 1.811698000  |

|   |             |              |              |
|---|-------------|--------------|--------------|
| 8 | 5.822436000 | 0.320567000  | -0.333766000 |
| 6 | 4.452738000 | -1.181557000 | 2.908876000  |
| 1 | 4.053931000 | -2.133665000 | 2.554842000  |
| 1 | 5.283257000 | -1.361096000 | 3.590019000  |
| 1 | 3.670846000 | -0.603799000 | 3.400097000  |
| 6 | 6.765724000 | -0.774015000 | -0.342012000 |
| 1 | 7.497875000 | -0.555029000 | -1.120125000 |
| 1 | 7.252436000 | -0.811816000 | 0.630740000  |
| 1 | 6.257337000 | -1.718251000 | -0.551828000 |
| 8 | 4.850952000 | 0.615649000  | -2.526705000 |
| 1 | 5.456171000 | 0.489833000  | -1.422675000 |

**Mo<sub>3</sub>O<sub>9</sub>H-PC<sub>2</sub>O<sub>2</sub>H<sub>5</sub> (product of intermolecular CH<sub>3</sub>OH elimination reaction)**

|    |              |              |              |
|----|--------------|--------------|--------------|
| 42 | 1.157874000  | -0.834933000 | -0.034641000 |
| 8  | 1.447311000  | -0.032934000 | -1.741033000 |
| 8  | 1.772315000  | -2.610691000 | -0.178843000 |
| 8  | -0.380954000 | -0.564476000 | 0.571056000  |
| 8  | 2.190418000  | 0.307650000  | 1.279209000  |
| 42 | 3.368860000  | -3.162972000 | -1.117327000 |
| 42 | 3.005305000  | -0.243564000 | -2.825352000 |
| 8  | 3.625993000  | -2.032848000 | -2.614162000 |
| 8  | 4.710958000  | -3.424573000 | -0.117192000 |
| 8  | 2.989549000  | -4.677431000 | -1.748086000 |
| 8  | 2.469280000  | -0.116366000 | -4.417134000 |
| 15 | 3.711327000  | 0.260710000  | 0.849927000  |
| 8  | 3.712344000  | -0.700296000 | -0.343184000 |
| 6  | 4.336575000  | 1.892287000  | 0.502670000  |
| 1  | 3.787539000  | 2.314548000  | -0.339881000 |
| 1  | 4.219625000  | 2.521490000  | 1.386639000  |
| 1  | 5.391812000  | 1.818395000  | 0.233688000  |
| 8  | 4.600317000  | -0.208290000 | 2.070699000  |

|   |             |              |              |
|---|-------------|--------------|--------------|
| 6 | 4.450875000 | -1.499417000 | 2.700372000  |
| 1 | 4.670388000 | -2.290815000 | 1.982164000  |
| 1 | 5.175080000 | -1.517143000 | 3.512519000  |
| 1 | 3.441017000 | -1.600165000 | 3.104199000  |
| 8 | 4.152095000 | 0.991933000  | -2.638830000 |

**DMMP on Mo<sub>3</sub>O<sub>9</sub>H<sub>2</sub> (A1)**

|    |              |              |              |
|----|--------------|--------------|--------------|
| 42 | 0.821684000  | -0.488083000 | -0.195752000 |
| 8  | 1.413933000  | 0.317532000  | -1.867083000 |
| 8  | 1.266304000  | -2.238828000 | -0.411429000 |
| 8  | -0.836991000 | -0.275571000 | 0.077505000  |
| 42 | 2.564783000  | -3.501928000 | -1.227231000 |
| 42 | 2.565566000  | -0.481575000 | -3.096842000 |
| 8  | 2.499326000  | -2.237860000 | -2.742919000 |
| 8  | 1.914518000  | -4.970792000 | -1.717440000 |
| 8  | 2.100535000  | -0.193330000 | -4.685506000 |
| 15 | 5.501172000  | 0.143275000  | 0.773258000  |
| 8  | 5.011615000  | -0.726979000 | -0.367786000 |
| 6  | 4.687347000  | 1.728257000  | 0.874735000  |
| 1  | 4.825294000  | 2.265188000  | -0.066244000 |
| 1  | 3.620577000  | 1.561427000  | 1.046291000  |
| 1  | 5.114798000  | 2.308026000  | 1.694313000  |
| 8  | 5.403946000  | -0.600259000 | 2.177234000  |
| 8  | 7.041246000  | 0.520724000  | 0.680897000  |

|   |             |              |              |
|---|-------------|--------------|--------------|
| 6 | 4.270531000 | -1.403288000 | 2.579713000  |
| 1 | 4.251713000 | -2.329853000 | 2.003505000  |
| 1 | 4.427706000 | -1.622273000 | 3.634490000  |
| 1 | 3.338176000 | -0.852562000 | 2.440535000  |
| 6 | 8.053526000 | -0.497686000 | 0.577859000  |
| 1 | 8.998370000 | 0.028994000  | 0.456606000  |
| 1 | 8.072962000 | -1.096759000 | 1.490458000  |
| 1 | 7.865771000 | -1.131669000 | -0.291351000 |
| 8 | 4.276462000 | 0.114809000  | -2.744757000 |
| 1 | 4.698649000 | -0.194459000 | -1.887488000 |
| 8 | 1.742429000 | 0.214750000  | 1.072009000  |
| 8 | 4.240686000 | -3.350019000 | -0.394602000 |
| 1 | 4.680309000 | -2.470360000 | -0.326897000 |

**DMMP on Mo<sub>3</sub>O<sub>9</sub>H<sub>2</sub> (A2)**

|    |             |              |              |
|----|-------------|--------------|--------------|
| 42 | 1.725393000 | 0.349744000  | -0.700009000 |
| 8  | 2.255233000 | -0.058339000 | -2.398275000 |
| 8  | 1.555782000 | -1.419349000 | 0.119523000  |
| 8  | 0.282764000 | 1.237571000  | -0.656278000 |
| 42 | 2.252884000 | -3.004287000 | -0.554451000 |
| 42 | 3.512218000 | -1.196521000 | -3.409110000 |
| 8  | 2.842525000 | -2.597979000 | -2.198477000 |
| 8  | 1.095980000 | -4.217078000 | -0.648706000 |
| 8  | 2.996383000 | -1.528975000 | -4.970560000 |
| 15 | 6.453867000 | -0.859277000 | 0.736287000  |
| 8  | 7.861371000 | -0.687441000 | 1.149723000  |
| 6  | 5.210758000 | -0.690905000 | 2.016147000  |
| 1  | 5.384486000 | -1.448541000 | 2.782673000  |
| 1  | 5.317993000 | 0.297251000  | 2.468801000  |
| 1  | 4.201511000 | -0.780672000 | 1.613434000  |
| 8  | 6.000647000 | 0.103905000  | -0.492680000 |
| 8  | 6.098975000 | -2.303073000 | 0.072662000  |

|   |             |              |              |
|---|-------------|--------------|--------------|
| 6 | 6.232941000 | 1.530252000  | -0.406322000 |
| 1 | 7.215561000 | 1.719896000  | 0.029300000  |
| 1 | 6.199348000 | 1.909443000  | -1.426936000 |
| 1 | 5.432580000 | 1.985241000  | 0.179934000  |
| 6 | 7.092402000 | -2.960750000 | -0.755200000 |
| 1 | 6.818455000 | -4.014435000 | -0.783410000 |
| 1 | 7.065853000 | -2.537031000 | -1.760873000 |
| 1 | 8.079566000 | -2.836302000 | -0.309006000 |
| 8 | 5.271081000 | -0.670076000 | -3.029697000 |
| 1 | 5.610736000 | -0.435149000 | -2.138540000 |
| 8 | 2.974176000 | 1.167087000  | 0.136215000  |
| 8 | 3.700451000 | -3.522943000 | 0.487096000  |
| 1 | 4.608409000 | -3.156438000 | 0.356843000  |

**DMMP on Mo<sub>3</sub>O<sub>9</sub>H<sub>2</sub> (A3)**

|    |             |              |              |
|----|-------------|--------------|--------------|
| 42 | 1.855348000 | -0.405819000 | -0.131175000 |
| 8  | 2.451009000 | -0.441110000 | -1.847122000 |
| 8  | 2.234162000 | -2.210877000 | 0.498229000  |
| 8  | 0.198081000 | -0.060955000 | -0.044815000 |
| 8  | 2.755337000 | 0.723980000  | 0.797461000  |
| 42 | 3.313236000 | -3.460730000 | -0.358358000 |
| 42 | 3.801977000 | -1.138618000 | -3.118891000 |
| 8  | 3.661939000 | -2.751839000 | -1.959773000 |
| 8  | 2.502373000 | -4.917852000 | -0.556264000 |
| 8  | 3.108618000 | -1.517901000 | -4.597323000 |
| 15 | 6.580666000 | -0.109274000 | 0.463743000  |
| 8  | 5.637631000 | -1.253578000 | 0.246267000  |
| 6  | 8.310705000 | -0.509864000 | 0.250597000  |
| 1  | 8.570948000 | -1.338615000 | 0.911821000  |
| 1  | 8.484319000 | -0.807056000 | -0.785712000 |
| 1  | 8.926713000 | 0.358540000  | 0.489049000  |
| 8  | 6.358206000 | 1.077329000  | -0.601821000 |
| 8  | 6.473747000 | 0.565761000  | 1.900563000  |

|   |             |              |              |
|---|-------------|--------------|--------------|
| 6 | 5.500975000 | 2.218948000  | -0.343188000 |
| 1 | 5.916555000 | 2.799045000  | 0.481903000  |
| 1 | 5.511872000 | 2.808129000  | -1.258554000 |
| 1 | 4.486868000 | 1.890871000  | -0.109094000 |
| 6 | 5.371912000 | 0.319159000  | 2.808315000  |
| 1 | 5.599226000 | 0.897764000  | 3.701898000  |
| 1 | 4.430155000 | 0.644153000  | 2.364681000  |
| 1 | 5.323603000 | -0.743498000 | 3.051079000  |
| 8 | 5.352167000 | -0.078015000 | -3.037480000 |
| 1 | 5.793053000 | 0.304030000  | -2.257133000 |
| 8 | 4.873463000 | -3.706718000 | 0.604005000  |
| 1 | 5.426730000 | -2.878365000 | 0.578931000  |

**DMMP on Mo<sub>3</sub>O<sub>9</sub>H<sub>2</sub> (A4)**

|    |              |              |              |
|----|--------------|--------------|--------------|
| 42 | -1.999723000 | 0.534427000  | 0.664536000  |
| 8  | -1.239617000 | 1.581874000  | -0.797848000 |
| 8  | -1.484723000 | -1.162722000 | 0.266381000  |
| 8  | -3.687876000 | 0.657875000  | 0.635454000  |
| 42 | 0.109123000  | -2.193171000 | -0.298159000 |
| 42 | 0.087108000  | 0.939024000  | -1.930444000 |
| 8  | 0.181884000  | -0.834654000 | -1.785835000 |
| 8  | -0.426236000 | -3.551041000 | -1.113509000 |
| 8  | -0.421737000 | 1.237594000  | -3.499470000 |
| 15 | 1.860552000  | 0.928771000  | 1.457103000  |
| 8  | 0.904327000  | 0.305011000  | 0.474561000  |
| 6  | 1.446418000  | 2.592680000  | 1.944172000  |
| 1  | 1.463113000  | 3.226210000  | 1.054095000  |
| 1  | 0.434558000  | 2.587076000  | 2.356908000  |
| 1  | 2.167695000  | 2.966489000  | 2.672838000  |
| 8  | 2.084051000  | -0.001290000 | 2.739774000  |
| 8  | 3.334946000  | 1.047312000  | 0.850906000  |
| 6  | 1.123716000  | -0.090974000 | 3.827053000  |



|   |              |              |              |
|---|--------------|--------------|--------------|
| 1 | 0.102182000  | -0.076725000 | 3.444376000  |
| 1 | 1.337562000  | -1.028412000 | 4.337474000  |
| 1 | 1.283924000  | 0.746447000  | 4.508575000  |
| 6 | 4.183631000  | -0.110252000 | 0.675696000  |
| 1 | 5.050986000  | 0.236698000  | 0.117080000  |
| 1 | 4.490904000  | -0.487031000 | 1.652071000  |
| 1 | 3.661645000  | -0.890436000 | 0.116670000  |
| 8 | 1.749575000  | 1.827924000  | -1.805949000 |
| 1 | 2.464842000  | 1.515301000  | -1.231776000 |
| 8 | -1.401838000 | 1.077835000  | 2.187662000  |
| 8 | 1.395779000  | -2.511509000 | 1.061543000  |
| 1 | 1.737086000  | -1.892319000 | 1.721507000  |

**Mo<sub>3</sub>O<sub>9</sub>H<sub>2</sub> (A4) -PC<sub>2</sub>O<sub>3</sub>H<sub>6</sub>• (product of P-CH<sub>3</sub> bond cleavage reaction)**

|    |              |              |              |
|----|--------------|--------------|--------------|
| 42 | -1.368981000 | 0.934725000  | 0.737667000  |
| 8  | -0.952251000 | 1.544163000  | -0.925054000 |
| 8  | -1.755496000 | -0.838574000 | 0.583874000  |
| 8  | -2.737633000 | 1.749918000  | 1.273141000  |
| 42 | -0.627391000 | -2.139301000 | -0.424899000 |
| 42 | 0.360852000  | 0.661756000  | -2.157736000 |
| 8  | -0.283024000 | -1.137771000 | -2.006379000 |
| 8  | -1.800394000 | -3.285824000 | -0.769835000 |
| 8  | -0.219566000 | 1.278755000  | -3.604617000 |
| 15 | 1.558493000  | 0.572562000  | 1.318133000  |
| 8  | 0.805012000  | -0.125805000 | 0.132611000  |
| 8  | 1.853829000  | -0.488221000 | 2.502632000  |
| 8  | 3.086657000  | 0.495849000  | 0.609571000  |
| 6  | 0.994753000  | -0.733064000 | 3.628107000  |
| 1  | 0.066926000  | -1.210298000 | 3.305468000  |
| 1  | 1.548010000  | -1.409570000 | 4.278444000  |
| 1  | 0.769770000  | 0.196577000  | 4.151340000  |
| 6  | 4.234599000  | 0.970963000  | 1.321543000  |

|   |             |              |              |
|---|-------------|--------------|--------------|
| 1 | 5.082634000 | 0.875080000  | 0.643645000  |
| 1 | 4.113786000 | 2.021107000  | 1.602915000  |
| 1 | 4.403330000 | 0.361367000  | 2.212460000  |
| 8 | 2.212062000 | 0.879124000  | -2.053007000 |
| 1 | 2.702252000 | 0.681010000  | -1.226789000 |
| 8 | 0.001732000 | 1.260014000  | 1.952581000  |
| 8 | 0.864108000 | -2.930185000 | 0.406596000  |
| 1 | 1.568006000 | -2.378800000 | 0.783021000  |

**Mo<sub>3</sub>O<sub>9</sub>H<sub>2</sub> (A4) -PC<sub>2</sub>O<sub>3</sub>H<sub>6</sub>• (product of PO-CH<sub>3</sub> bond cleavage reaction)**

|    |              |              |              |
|----|--------------|--------------|--------------|
| 42 | -2.029925000 | 0.781978000  | 0.500565000  |
| 8  | -1.164878000 | 1.524867000  | -1.076573000 |
| 8  | -1.693486000 | -1.042508000 | 0.492928000  |
| 8  | -3.688845000 | 1.016183000  | 0.321721000  |
| 42 | -0.113751000 | -2.073072000 | 0.008016000  |
| 42 | 0.226455000  | 0.725416000  | -1.996746000 |
| 8  | 0.120089000  | -1.050166000 | -1.752813000 |
| 8  | -0.683942000 | -3.502221000 | -0.653416000 |
| 8  | -0.127747000 | 0.967742000  | -3.614685000 |
| 15 | 1.849505000  | 0.647619000  | 1.406176000  |
| 8  | 0.721798000  | 0.250550000  | 0.405868000  |
| 6  | 1.459161000  | 2.180989000  | 2.240482000  |
| 1  | 1.288586000  | 2.976798000  | 1.512565000  |
| 1  | 0.556636000  | 2.045285000  | 2.837490000  |
| 1  | 2.299668000  | 2.448203000  | 2.884004000  |
| 8  | 2.268732000  | -0.467469000 | 2.328687000  |
| 8  | 3.108159000  | 1.084343000  | 0.435181000  |
| 6  | 4.344687000  | 0.338869000  | 0.431071000  |

|   |              |              |              |
|---|--------------|--------------|--------------|
| 1 | 5.100975000  | 1.001858000  | 0.012682000  |
| 1 | 4.606792000  | 0.047963000  | 1.448071000  |
| 1 | 4.242035000  | -0.553361000 | -0.190635000 |
| 8 | 1.896811000  | 1.497658000  | -1.876505000 |
| 1 | 2.440756000  | 1.395661000  | -1.046800000 |
| 8 | -1.591125000 | 1.546998000  | 1.949989000  |
| 8 | 1.091087000  | -2.440340000 | 1.325415000  |
| 1 | 1.618240000  | -1.722168000 | 1.853228000  |

**Mo<sub>3</sub>O<sub>9</sub>H<sub>2</sub> (A4) -PC<sub>2</sub>O<sub>2</sub>H<sub>6</sub>• (product of P-OCH<sub>3</sub> bond cleavage reaction)**

|    |              |              |              |
|----|--------------|--------------|--------------|
| 42 | -2.004879000 | 0.607794000  | 0.602857000  |
| 8  | -1.186823000 | 1.565640000  | -0.864540000 |
| 8  | -1.608650000 | -1.209499000 | 0.412244000  |
| 8  | -3.672727000 | 0.790132000  | 0.452420000  |
| 42 | 0.105018000  | -1.971970000 | -0.052831000 |
| 42 | 0.268756000  | 0.924460000  | -1.833344000 |
| 8  | 0.224490000  | -0.868118000 | -1.807853000 |
| 8  | -0.206397000 | -3.380305000 | -0.909968000 |
| 8  | -0.078210000 | 1.341547000  | -3.419266000 |
| 15 | 1.841656000  | 0.607942000  | 1.551319000  |
| 8  | 0.736095000  | 0.167339000  | 0.435281000  |
| 6  | 1.402402000  | 2.339291000  | 1.913901000  |
| 1  | 1.309389000  | 2.928436000  | 0.997201000  |
| 1  | 0.456916000  | 2.360739000  | 2.458843000  |
| 1  | 2.188690000  | 2.772659000  | 2.537306000  |
| 8  | 3.164912000  | 0.992171000  | 0.558845000  |
| 6  | 4.186912000  | 0.005128000  | 0.368159000  |

|   |              |              |              |
|---|--------------|--------------|--------------|
| 1 | 5.031051000  | 0.506935000  | -0.105436000 |
| 1 | 4.500268000  | -0.406521000 | 1.330846000  |
| 1 | 3.835963000  | -0.804706000 | -0.279501000 |
| 8 | 1.905682000  | 1.741051000  | -1.608122000 |
| 1 | 2.476123000  | 1.518392000  | -0.812551000 |
| 8 | -1.595611000 | 1.215466000  | 2.132986000  |
| 8 | 1.219563000  | -2.394383000 | 1.382549000  |
| 1 | 1.561835000  | -1.720654000 | 2.004847000  |

**DMMP on Mo<sub>3</sub>O<sub>9</sub>H<sub>2</sub> (A4) : TS for intramolecular CH<sub>3</sub>OH elimination reaction**

|    |              |              |              |
|----|--------------|--------------|--------------|
| 42 | -1.975973000 | 0.408821000  | 0.603684000  |
| 8  | -1.458364000 | 1.451455000  | -0.960120000 |
| 8  | -1.503090000 | -1.280954000 | 0.131699000  |
| 8  | -3.642698000 | 0.523487000  | 0.879312000  |
| 42 | -0.014818000 | -2.343140000 | -0.613193000 |
| 42 | -0.276663000 | 0.838982000  | -2.256613000 |
| 8  | -0.036460000 | -0.910856000 | -2.013474000 |
| 8  | -0.617653000 | -3.724960000 | -1.341983000 |
| 8  | -1.020409000 | 1.014074000  | -3.747265000 |
| 15 | 1.670200000  | 1.012844000  | 1.353714000  |
| 8  | 1.109610000  | 0.551520000  | 0.045787000  |
| 6  | 1.844801000  | 2.597299000  | 1.939477000  |
| 1  | 1.317203000  | 3.355389000  | 1.367257000  |
| 1  | 1.724677000  | 2.704225000  | 3.014954000  |
| 1  | 3.390142000  | 2.013683000  | 1.496445000  |
| 8  | 1.708668000  | -0.171801000 | 2.433443000  |
| 8  | 3.485812000  | 1.036527000  | 1.015363000  |

|   |              |              |              |
|---|--------------|--------------|--------------|
| 6 | 1.212236000  | -0.035173000 | 3.789190000  |
| 1 | 0.216457000  | 0.406865000  | 3.770568000  |
| 1 | 1.174739000  | -1.047006000 | 4.189274000  |
| 1 | 1.907658000  | 0.569986000  | 4.374180000  |
| 6 | 4.468682000  | 0.019337000  | 1.302550000  |
| 1 | 5.429145000  | 0.379173000  | 0.935642000  |
| 1 | 4.508262000  | -0.177175000 | 2.374918000  |
| 1 | 4.174125000  | -0.880866000 | 0.762880000  |
| 8 | 1.335003000  | 1.792206000  | -2.403327000 |
| 1 | 1.985436000  | 1.565599000  | -1.718801000 |
| 8 | -1.097386000 | 0.932352000  | 1.991072000  |
| 8 | 1.317598000  | -2.512985000 | 0.717791000  |
| 1 | 1.530674000  | -1.836088000 | 1.381398000  |

**Mo<sub>3</sub>O<sub>9</sub>H<sub>2</sub> (A4)-PC<sub>2</sub>O<sub>2</sub>H<sub>5</sub> (product of intramolecular CH<sub>3</sub>OH elimination reaction)**

|    |              |              |              |
|----|--------------|--------------|--------------|
| 42 | -2.073508000 | 0.435394000  | 0.495615000  |
| 8  | -1.408550000 | 0.966727000  | -1.288205000 |
| 8  | -1.399097000 | -1.390902000 | 0.017873000  |
| 8  | -3.731051000 | 0.287167000  | 0.639238000  |
| 42 | 0.039985000  | -2.120788000 | -0.762602000 |
| 42 | 0.089547000  | 0.856899000  | -2.333616000 |
| 8  | 0.613963000  | -1.009925000 | -2.125870000 |
| 8  | -0.529606000 | -3.507297000 | -1.505542000 |
| 8  | -0.261482000 | 1.208319000  | -3.950604000 |
| 15 | 0.824918000  | 0.713339000  | 1.679840000  |
| 8  | 1.085848000  | -0.227868000 | 0.532086000  |
| 6  | 1.758549000  | 2.235669000  | 1.560343000  |
| 1  | 1.465520000  | 2.937760000  | 2.343301000  |
| 1  | 2.823140000  | 2.006548000  | 1.642583000  |
| 8  | 1.221894000  | -0.029266000 | 3.040958000  |
| 6  | 0.895053000  | 0.506440000  | 4.331791000  |

|   |              |              |              |
|---|--------------|--------------|--------------|
| 1 | -0.170046000 | 0.740985000  | 4.389037000  |
| 1 | 1.144607000  | -0.267931000 | 5.055505000  |
| 1 | 1.490128000  | 1.400770000  | 4.536907000  |
| 8 | 1.288981000  | 1.934890000  | -1.778562000 |
| 1 | 1.571206000  | 2.671228000  | 0.575685000  |
| 8 | -0.706774000 | 1.099040000  | 1.800496000  |
| 8 | 1.340536000  | -2.853691000 | 0.369533000  |
| 1 | 1.730286000  | -2.178274000 | 0.952394000  |

**DMMP on Mo<sub>3</sub>O<sub>9</sub>H<sub>2</sub> (A4) : TS for intermolecular CH<sub>3</sub>OH elimination reaction**

|    |             |              |              |
|----|-------------|--------------|--------------|
| 42 | 1.576488000 | -0.628753000 | -0.185726000 |
| 8  | 1.999888000 | 0.415262000  | -1.676624000 |
| 8  | 1.602929000 | -2.366366000 | -0.627563000 |
| 8  | 0.002495000 | -0.300918000 | 0.308061000  |
| 42 | 3.133865000 | -3.429400000 | -1.419092000 |
| 42 | 3.442169000 | -0.229826000 | -2.842550000 |
| 8  | 3.203681000 | -2.017032000 | -2.826505000 |
| 8  | 2.387926000 | -4.735617000 | -2.146439000 |
| 8  | 3.046206000 | 0.282691000  | -4.395435000 |
| 15 | 4.348074000 | -0.092078000 | 0.613586000  |
| 8  | 3.882218000 | -1.029216000 | -0.551925000 |
| 6  | 4.325971000 | 1.726450000  | 0.609333000  |
| 1  | 3.630969000 | 2.066990000  | -0.161750000 |
| 1  | 3.935719000 | 2.050568000  | 1.574978000  |
| 1  | 5.314561000 | 2.139267000  | 0.426676000  |
| 8  | 5.074290000 | -0.774732000 | 1.864785000  |
| 8  | 5.998184000 | 0.033521000  | -0.250119000 |

|   |             |              |              |
|---|-------------|--------------|--------------|
| 6 | 4.402667000 | -1.185280000 | 3.071756000  |
| 1 | 3.732580000 | -2.021635000 | 2.869426000  |
| 1 | 5.196461000 | -1.494204000 | 3.750631000  |
| 1 | 3.835083000 | -0.358659000 | 3.498350000  |
| 6 | 6.936549000 | -1.047330000 | -0.268919000 |
| 1 | 7.799302000 | -0.721408000 | -0.852325000 |
| 1 | 7.245427000 | -1.266673000 | 0.752871000  |
| 1 | 6.502695000 | -1.937140000 | -0.736134000 |
| 8 | 5.060793000 | 0.441975000  | -2.441238000 |
| 1 | 5.620081000 | 0.236152000  | -1.382017000 |
| 8 | 2.710849000 | -0.110719000 | 1.241014000  |
| 8 | 4.571277000 | -3.817903000 | -0.246816000 |
| 1 | 5.037236000 | -3.171676000 | 0.299376000  |

**Mo<sub>3</sub>O<sub>9</sub>H<sub>2</sub> (A4) -PC<sub>2</sub>O<sub>2</sub>H<sub>5</sub> (product of intermolecular CH<sub>3</sub>OH elimination reaction)**

|    |              |              |              |
|----|--------------|--------------|--------------|
| 42 | -1.999940000 | 0.527392000  | 0.903211000  |
| 8  | -1.505941000 | 1.115794000  | -0.919785000 |
| 8  | -1.267237000 | -1.252478000 | 0.333908000  |
| 8  | -3.633412000 | 0.290601000  | 1.161890000  |
| 42 | 0.140471000  | -1.889397000 | -0.573132000 |
| 42 | -0.071958000 | 1.141544000  | -2.051441000 |
| 8  | 0.572430000  | -0.697677000 | -1.915017000 |
| 8  | -0.412175000 | -3.280941000 | -1.318471000 |
| 8  | -0.525464000 | 1.529854000  | -3.634510000 |
| 15 | 0.948771000  | 0.967009000  | 1.978812000  |
| 8  | 1.194114000  | -0.017419000 | 0.854940000  |
| 6  | 1.798397000  | 2.522057000  | 1.782572000  |
| 1  | 1.573037000  | 2.911329000  | 0.786853000  |
| 1  | 1.481375000  | 3.224109000  | 2.555048000  |
| 1  | 2.873344000  | 2.347489000  | 1.860019000  |
| 8  | 1.461548000  | 0.446572000  | 3.399692000  |
| 6  | 0.899728000  | -0.721886000 | 4.016678000  |
| 1  | 0.999880000  | -1.592875000 | 3.363568000  |

|   |              |              |              |
|---|--------------|--------------|--------------|
| 1 | 1.466190000  | -0.885059000 | 4.931981000  |
| 1 | -0.151966000 | -0.551336000 | 4.257529000  |
| 8 | 1.099126000  | 2.255061000  | -1.506249000 |
| 8 | -0.608918000 | 1.240833000  | 2.131887000  |
| 8 | 1.576799000  | -2.559583000 | 0.427187000  |
| 1 | 1.977116000  | -1.829462000 | 0.936648000  |

### DMMP on Mo<sub>3</sub>O<sub>9</sub>H<sub>3</sub> (B1)

|    |              |              |              |
|----|--------------|--------------|--------------|
| 42 | 0.657980000  | -0.409360000 | -0.303080000 |
| 8  | 1.097210000  | -0.181077000 | -2.127882000 |
| 8  | 1.144055000  | -2.237970000 | -0.060164000 |
| 8  | -0.992249000 | -0.148654000 | -0.076912000 |
| 42 | 2.424446000  | -3.349574000 | -0.932925000 |
| 42 | 2.420507000  | -0.764106000 | -3.359746000 |
| 8  | 2.508148000  | -2.513801000 | -2.627144000 |
| 8  | 1.886977000  | -4.937304000 | -1.114245000 |
| 8  | 1.828362000  | -0.786859000 | -4.936758000 |
| 15 | 5.696990000  | 0.430151000  | 0.674174000  |
| 8  | 4.587121000  | -0.161881000 | -0.173121000 |
| 6  | 5.552978000  | 2.196114000  | 0.900903000  |
| 1  | 5.597550000  | 2.690262000  | -0.071691000 |
| 1  | 4.591534000  | 2.418534000  | 1.370309000  |
| 1  | 6.364814000  | 2.555957000  | 1.534795000  |
| 8  | 5.778731000  | -0.268991000 | 2.103659000  |
| 8  | 7.152357000  | 0.252978000  | 0.076305000  |



|   |             |              |              |
|---|-------------|--------------|--------------|
| 6 | 4.632456000 | -0.855511000 | 2.761101000  |
| 1 | 4.281858000 | -1.722198000 | 2.199057000  |
| 1 | 4.984339000 | -1.162204000 | 3.744335000  |
| 1 | 3.828217000 | -0.123521000 | 2.864873000  |
| 6 | 7.686635000 | -1.049877000 | -0.239955000 |
| 1 | 8.680950000 | -0.873305000 | -0.645097000 |
| 1 | 7.751152000 | -1.655204000 | 0.666064000  |
| 1 | 7.062183000 | -1.543385000 | -0.987277000 |
| 8 | 4.032805000 | 0.113253000  | -2.938362000 |
| 1 | 4.364713000 | 0.109901000  | -2.016165000 |
| 8 | 4.079940000 | -2.944298000 | -0.105194000 |
| 1 | 4.378937000 | -2.011469000 | -0.162212000 |
| 8 | 1.972611000 | 0.573879000  | 0.644204000  |
| 1 | 2.897979000 | 0.419573000  | 0.358208000  |

### DMMP on Mo<sub>3</sub>O<sub>9</sub>H<sub>3</sub> (B2)

|    |             |              |              |
|----|-------------|--------------|--------------|
| 42 | 1.623362000 | 0.205473000  | -0.749993000 |
| 8  | 2.301687000 | -0.113304000 | -2.485335000 |
| 8  | 1.605821000 | -1.581239000 | -0.089198000 |
| 8  | 0.083003000 | 0.869725000  | -0.889859000 |
| 42 | 2.261845000 | -3.295733000 | -0.628930000 |
| 42 | 3.496280000 | -1.288725000 | -3.363624000 |
| 8  | 3.040822000 | -2.781425000 | -2.281117000 |
| 8  | 0.999615000 | -4.369992000 | -0.920011000 |
| 8  | 3.013952000 | -1.493342000 | -4.962865000 |
| 15 | 6.353091000 | -0.721563000 | 0.821294000  |
| 8  | 7.791664000 | -0.537400000 | 1.099639000  |
| 6  | 5.207477000 | -0.608500000 | 2.193072000  |
| 1  | 5.482439000 | -1.354651000 | 2.941249000  |
| 1  | 5.288575000 | 0.385788000  | 2.637646000  |
| 1  | 4.178048000 | -0.771890000 | 1.868665000  |
| 8  | 5.793874000 | 0.351757000  | -0.301364000 |
| 8  | 5.938687000 | -2.124539000 | 0.139478000  |

|   |             |              |              |
|---|-------------|--------------|--------------|
| 6 | 6.518277000 | 1.598626000  | -0.493308000 |
| 1 | 7.590661000 | 1.407715000  | -0.477509000 |
| 1 | 6.207046000 | 1.985391000  | -1.462929000 |
| 1 | 6.247218000 | 2.304117000  | 0.294801000  |
| 6 | 6.865361000 | -2.794578000 | -0.757335000 |
| 1 | 6.541265000 | -3.833088000 | -0.802369000 |
| 1 | 6.804646000 | -2.340765000 | -1.747754000 |
| 1 | 7.877039000 | -2.726164000 | -0.356501000 |
| 8 | 5.243783000 | -0.693938000 | -2.944341000 |
| 1 | 5.474242000 | -0.365184000 | -2.054779000 |
| 8 | 3.669232000 | -3.790334000 | 0.523936000  |
| 1 | 4.492699000 | -3.267314000 | 0.559156000  |
| 8 | 3.009179000 | 1.147210000  | 0.136884000  |
| 1 | 3.947828000 | 0.948452000  | -0.032770000 |

### DMMP on Mo<sub>3</sub>O<sub>9</sub>H<sub>3</sub> (B3)

|    |             |              |              |
|----|-------------|--------------|--------------|
| 42 | 2.661535000 | -0.342559000 | -0.478957000 |
| 8  | 2.788344000 | -0.397819000 | -2.274345000 |
| 8  | 2.861811000 | -2.093262000 | 0.053029000  |
| 8  | 1.174770000 | 0.287454000  | -0.002885000 |
| 42 | 3.518022000 | -3.613593000 | -1.037998000 |
| 42 | 3.914357000 | -1.175945000 | -3.683346000 |
| 8  | 3.674512000 | -2.868103000 | -2.713431000 |
| 8  | 2.517955000 | -4.952807000 | -0.806953000 |
| 8  | 3.097428000 | -1.142073000 | -5.152752000 |
| 15 | 7.418949000 | -1.009726000 | 0.005114000  |
| 8  | 6.412992000 | -0.254753000 | -0.828690000 |
| 6  | 8.136911000 | -2.423185000 | -0.813166000 |
| 1  | 7.344415000 | -3.157077000 | -0.983875000 |
| 1  | 8.561675000 | -2.106397000 | -1.768474000 |
| 1  | 8.917312000 | -2.856526000 | -0.185505000 |
| 8  | 8.588022000 | -0.049190000 | 0.527228000  |
| 8  | 6.837708000 | -1.620403000 | 1.359290000  |

|   |             |              |              |
|---|-------------|--------------|--------------|
| 6 | 9.033831000 | 1.090246000  | -0.230508000 |
| 1 | 8.180122000 | 1.648057000  | -0.618270000 |
| 1 | 9.607921000 | 1.707166000  | 0.459076000  |
| 1 | 9.675684000 | 0.765638000  | -1.053368000 |
| 6 | 6.350380000 | -0.774738000 | 2.426262000  |
| 1 | 6.076462000 | -1.447742000 | 3.236857000  |
| 1 | 7.143665000 | -0.100619000 | 2.753371000  |
| 1 | 5.476168000 | -0.212389000 | 2.091697000  |
| 8 | 5.670048000 | -0.536431000 | -3.472728000 |
| 1 | 6.077251000 | -0.398796000 | -2.589520000 |
| 8 | 5.242008000 | -3.705922000 | -0.178310000 |
| 1 | 5.406882000 | -3.229789000 | 0.649156000  |
| 8 | 4.106499000 | 0.640057000  | 0.176164000  |
| 1 | 5.002149000 | 0.458889000  | -0.215399000 |
